# Supplementary material for: Optimized light-inducible transcription in mammalian cells using Flavin Kelch-repeat F-box1/GIGANTEA and CRY2/CIB1
Source: Oxford University Press journal article supplement (doi:10.1093/nar/gkx804), 2017-09-04
Supplement: gkx804_supp.pdf [file gkx804_supp.pdf]

## **SUPPLEMENTARY TABLE AND FIGURE LEGEND**

### **Supplementary Table 1 A summary of FKF1 NLOV mutagenesis**

### **Supplementary Table 2 Comparison of the light-inducible systems**

### **Supplementary Figure 1 Mutant screens of FKF1 under dark.**

(A) A summary of FKF1 (NLOV) mutagenesis (n=160). (B) Schematic representation of mutant tests using NLOV-VP16 and GI-Gal4DBD constructs in the dark. (C) A summary of Luc assay using 81 mutant candidates under the dark conditions. Forty five samples (red numbers) showed low background (n=1-2). The G128D mutant (red column and dashed line) and wild-type (WT, green) were used as controls. #120 was an empty vector (pc3, pcDNA3).

### **Supplementary Figure 2 Developing an illumination system in culture incubator.**

A block diagram (A) and a sketch (B) of our blue LED illuminator are shown. The illuminator was installed into a CO<sub>2</sub> incubator (C) that enables precise control of temperature, CO<sub>2</sub> and blue LED illumination (D), 447.5 nm, 0.5 mW).

### **Supplementary Figure 3 Mutant screens of FKF1 with illumination.**

A summary of the Luc assay results testing the 45 candidates that showed low background under dark conditions in Supplementary Figure 1C. Six mutants (#52, 90, 117, 119, 143 and 154) demonstrated similar or higher Luc induction with light compared to G128D (n=1-2). MT, a light-insensitive mutant. The result of the six candidates after repeated tests was shown in Figure 1C (inset) with statistical analyses. Supplementary Figure 3 inset delineates the illumination protocol used in these experiments (blue LED, 447.5nm, 0.5 mW, 6.25  $\mu\text{W}/\text{mm}^2$ ).

### **Supplementary Figure 4 Characterization of NLOV/GI-based systems using Western blot.**

Western blotting images of Gal4DBD-NLOV (G128D or H105L) (A) and the full-length and deleted GI fragments (1-1,173, 960, 673, 563 and 391aa) fused with Gal4DBD at the C-terminus (B) and the shorter fragments of GI (1-100, 391, 563 and 673aa) fused with Gal4DBD (C). For Supplementary Figure 4 A-C, the arrowheads indicate the western blot bands for the various forms of Gal4DBD. (D) Western blotting images of FLAG-tagged GI-VP16.

### **Supplementary Figure 5 Examining the effects of FLAG-tag on the FKF1/GI-based system.**

(A) The illumination protocol used is shown (blue LED, 447.5nm, 0.5 mW, 6.25  $\mu\text{W}/\text{mm}^2$ ). (B) Luciferase assay to examine the effect of a FLAG-tag addition on GI-VP16 with Gal4DBD-NLOV (G128D)-HA-tag response to illumination (n.s., not significant n=6-9 in 2 independent experiments, mean  $\pm$  s.e.m.).

### **Supplementary Figure 6 Comparison of the FKF1/GI-based system to the CRY2/CIB1-based LITE2.0 system to control transcription with light.**

(A) The illumination protocol that was used (blue LED, 447.5nm, 0.5 mW, 6.25  $\mu\text{W}/\text{mm}^2$ ). (B) The short fragments of CRY2 (CRY2PHR) and modified CIB1 were used in the LITE2.0 system (ref. 4). (C) Luc assay to test the FKF1 (NLOV, H105L)/GI-based system and LITE2.0. The LITE2.0 system demonstrated significantly increased dark signal compared to the NLOV/GI-based system (\*\*  $P < 0.01$ ,  $n = 8-10$  in 4 independent experiments, mean  $\pm$  s.d.). (D) Fluorescent images using the NLOV/GI-based and LITE2.0 systems in HEK 293T cells to express red fluorescent proteins (RFP) in live cells. Hoechst 33285 was used for nuclear staining. Scale bar, 20  $\mu\text{m}$ . (E) Western blotting using the NLOV/GI-based and LITE2.0 systems to express destabilized green fluorescent protein (dsGFP) in HEK 293T cells. A housekeeping molecule,  $\beta$ -tubulin, was examined as an internal control in the cells. D, dark. L, light. (F) Quantification of dsGFP proteins to compare the NLOV/GI-based and LITE2.0 systems. The expression of dsGFP was normalized to  $\beta$ -tubulin expression (n.s., not significant \*\*  $P < 0.01$   $n = 4$  in two independent experiments, mean  $\pm$  s.d.). The LITE2.0 system demonstrated significantly increased dark signal when compared to the FKF1/GI-based system.

#### **Supplementary Figure 7 Comparisons of the FKF1/GI-based system to the other light-inducible systems.**

Comparisons of the FKF1/GI-based systems to the other light-inducible systems, the VVD/LightOn- and EL222-based systems ( $n = 4-16$ , mean  $\pm$  s.d.). The DNA amounts indicated were used for transfection in a well of 24-well plates. Illumination protocol used is described in the insert (Protocol B).

#### **Supplementary Figure 8 Comparison and optimization of the FKF1/GI and Cry2/CIB1 system.**

(A) Illumination protocol used in Figure S8B is indicated (blue LED, 447.5nm, 0.5 mW, 6.25  $\mu\text{W}/\text{mm}^2$ ). (B) Comparison of NLOV/GI and 1:1 DNA ratio CRY2/CIB1 ( $n = 4$  mean  $\pm$  s.d.). (C) Illumination protocol used for in Figure S8D,E,H and I is indicated (blue LED, 447.5nm, 0.5 mW, 6.25  $\mu\text{W}/\text{mm}^2$ ). (D, E) DNA ratio optimization of NLOV/GI and CRY2/CIB1 respectively (\*  $P < 0.05$ ,  $n = 3$  in 3 independent experiments, mean  $\pm$  s.d.). CRY2/CIB1 benefits from a ratio of 5:1 CRY2:CIB1. (F, G) Illumination protocols used for in Figure S8H and I are indicated (blue LED, 447.5nm, 0.5 mW, 6.25  $\mu\text{W}/\text{mm}^2$ ). (H, I) Luciferase assay results of NLOV/GI and CRY2/CIB1 respectively with variable illumination cycles. (n.s., not significant, \*\*  $P < 0.01$ , \*\*\*  $P < 0.001$ ,  $n = 12$  in 2 independent experiments for Protocol B 8s and Protocol B 2s,  $n = 27$  and  $n = 58$  for CRY2 and FKF1 Protocol B respectively as compiled Legacy data was used, mean  $\pm$  s.d.). NLOV/GI has a significantly decreased induction when exposed to the 2s protocol. CRY2/CIB1 has a significantly decreased induction when exposed to shorter light and longer dark cycles as compared to Protocol B.

#### **Supplementary Figure 9 Representative FACS images and NIH 3T3 FACS results**

(A-C) Representative FACS images for HEK 293T, Human Fibroblasts and NIH 3T3 cells respectively. The raw FACS data was sorted for live cells, then the mCherry<sup>+</sup> (transfected cells) were selected. Finally, the GFP<sup>+</sup> cells were selected for in order to yield the GFP positive population of transfected cells. (D) A comparison of NLOV/GI and CRY2/CIB1 systems transfected into NIH3T3 cells illuminated following protocol B with Gal4-UAS-dsGFP (\*\*\*) P<0.001, n=8-12 in 2 independent experiments, mean ± s.d.). mCherry (red fluorescent protein, RFP) plasmid was used as transfection control.

### **Supplementary Figure 10 Cry2-VP16 and CIB1 NLOV/GI in vivo application, H105L with VP16, VP64 and NLOV/GI H105L G128D and NLOV homology model**

(A) Representative images of mouse livers from mice after illumination (dark (top), light (bottom) using Gal4-UAS-GFP with CRY2-VP16 and CIB1-Gal4DBD with hydrodynamic tail vein plasmid injection method (n=4). Scale bar, 2mm. (B) Homology model of FKF1 NLOV domain highlighting the H105 (red), G128 (purple) amino acids and the FKF1 family conserved loop (green). (C) Illumination protocol used in Supplementary Figure 10D and E is indicated (blue LED, 447.5nm, 0.5 mW, 6.25  $\mu\text{W}/\text{mm}^2$ ). (D) Luciferase assay results of NLOV/GI H105L and the NLOV/GI H105L G128D double mutant. (\*\*\*) P<0.001, n=8 in 2 independent experiments, mean ± s.d.). The double mutant has a significantly reduced induction amount compared with the NLOV/GI H105L. (E) Luciferase assay results of NLOV with GI-VP16 and GI-VP64. (n.s., not significant, n=12 in 2 independent experiments, mean ± s.d.). Using protocol B, there is no difference between the use of VP16 or VP64.

### **Supplementary Figure 11 The application of the IRES version of FKF1/GI-based light-induced transcription system for Myod1 expression**

(A) Luciferase assay results of HEK 293T cells with co-transfection of two plasmids: Gal4DBD-NLOV (H105L)-HA (G4D-NLOV) and FLAG-GI-VP16 (GI-VP16) and single transfection using the 2A self-cleavage and internal ribosome entry site (IRES) systems (\*\*\*) P<0.001, n=8 in 2 independent experiments, mean ± s.d.). (B) Luciferase assay results of mouse embryonic fibroblasts (MEF) with the new IRES construct: FLAG-GI-VP16-IRES-Gal4DBD-NLOV (H105L)-HA and Gal4 UAS firefly luciferase (n=9 in 2 independent experiments, mean ± s.d.). (C) Quantification of *Myod1* transcript expression in MEF with the new IRES construct: FLAG-GI-VP16-IRES-Gal4DBD-NLOV (H105L)-HA and Gal4 UAS-Myod1 (n=7 in 2 independent experiments, mean ± s.d.). (D) Representative fluorescent images of immunocytochemistry for Myod1 protein expression in illuminated MEF with FLAG-GI-VP16-IRES-Gal4DBD-NLOV (H105L)-HA and Gal4 UAS-Myod1. Hoechst 33285 (blue) was used for nuclear staining. Anti

mouse Myod1 antibody was used for Myod1 staining with Alexa 488 (green) secondary antibody.  
Scale bar, 50  $\mu\text{m}$ . Protocol B was used in these experiments.

## **SUPPLEMENTARY NOTE**

### ***LED illuminator development:***

The blue LED illuminator with heat control and a built-in fan was designed and developed by J. Jung.

The illuminator has following expandable features:

- 1) Switch on/off (automatically/manual) is available using a LED assembly consisting of 7 rebel LEDs (Luxeion, #SR-02-R0500). The intensity/brightness of the LED can be adjusted from 0% (off) to 100% (max brightness).
- 2) Typical characteristics of one LED Assembly is 6W, fixed wavelength 447.5nm (other assemblies are also available).
- 3) While the LEDs are turned on, thermal heat will be sank into the water-jacked incubator in which the LED assembly is mounted.
- 4) The fan mounted above the heat sinks can be turned on (automatically or manually) to enforce the airflow through the heat sinks to ensure a homogeneous temperature below the LEDs.
- 5) While the LEDs are turned off, heat elements can be switched on (automatic/manual). These elements should emit the same amount of thermal heat as when the LED's are turned on. This would help stabilize the temperature in the incubator.
- 6) Small, enclosed high precision temperature sensors (+/- 0.065 °C resolution) are used to monitor temperature of the sample and control areas below the LEDs. Temperature data are logged with time/date stamps and stored on an SD card. Data is also shown on a display.
- 7) A programmed sequence (turn the LED/heater/fan on and off, measure the temperature and log the data) can last several days and is started by pushing the start button on the controller. The time sequence limit is set by the software (Arduino).
- 8) Interval length adjustments and LED intensity settings are determined (0.5 mW, 6.25  $\mu\text{W}/\text{mm}^2$ ) by changing the appropriate parameters in the software, which can be easily updated when connecting the micro controller to a computer using the USB interface.

### ***EL222 transfection:***

Following Dr. Motta-Mena's protocol and advices, we transfected the EL222 system in HEK 293T cells using the following ratio of plasmids: VP-EL222: pGL-C120-Luc: HSV-TK-Renilla = 5: 1: 0.04 (total plasmids DNA, 0.5  $\mu\text{g}/\text{well}$  in 24-well plate).

**Statistical Analyses:**

| <b>Figure</b>        | <b>Statistics used</b>                                                   |
|----------------------|--------------------------------------------------------------------------|
| Figure 1C            | Bartlett test and one-factor ANOVA with a Bonferroni/Dunn test           |
| Figure S3            | Bartlett test and one-factor ANOVA with a Bonferroni/Dunn test           |
| Figure 2B, C         | Bartlett test and one-factor ANOVA with a Bonferroni/Dunn test           |
| Figure 2E, F         | F Test and Unpaired T test                                               |
| Figure 2G, H         | F Test and Unpaired T test                                               |
| Figure S5B           | F Test and Unpaired T test                                               |
| Figure S6C, F        | F Test and Unpaired T test                                               |
| Figure 3             | Bartlett test and one-factor ANOVA with a Bonferroni/Dunn test           |
| Figure S7            | Bartlett test and one-factor ANOVA with a Bonferroni/Dunn test           |
| Figure 4C            | F Test and Unpaired T test                                               |
| Figure 4H            | Bartlett test and one-factor ANOVA with a Bonferroni/Dunn test           |
| Figure 4G            | F Test and Unpaired t test with Welch's correction                       |
| Figure 4I-K          | F Test and Unpaired t test                                               |
| Figure 4N-O          | Bartlett test and One way Anova with Dunnett's Multiple comparisons test |
| Figure S7B           | Bartlett test and one-factor ANOVA with a Bonferroni/Dunn test           |
| Figure S7 D, E, I, J | Bartlett test and one-factor ANOVA with a Bonferroni/Dunn test           |
| Figure S9D           | F Test and Unpaired T test with Welch's correction                       |
| Figure 5D            | F Test and Unpaired t test with Welch's correction                       |
| Figure S10 B         | Bartlett test and one-factor ANOVA with a Bonferroni/Dunn test           |
| Figure SF11 A        | Bartlett test and one-factor ANOVA with a Bonferroni/Dunn test           |
| Figure SF11 B        | F Test and Unpaired T test                                               |

## Protocol summary for illumination

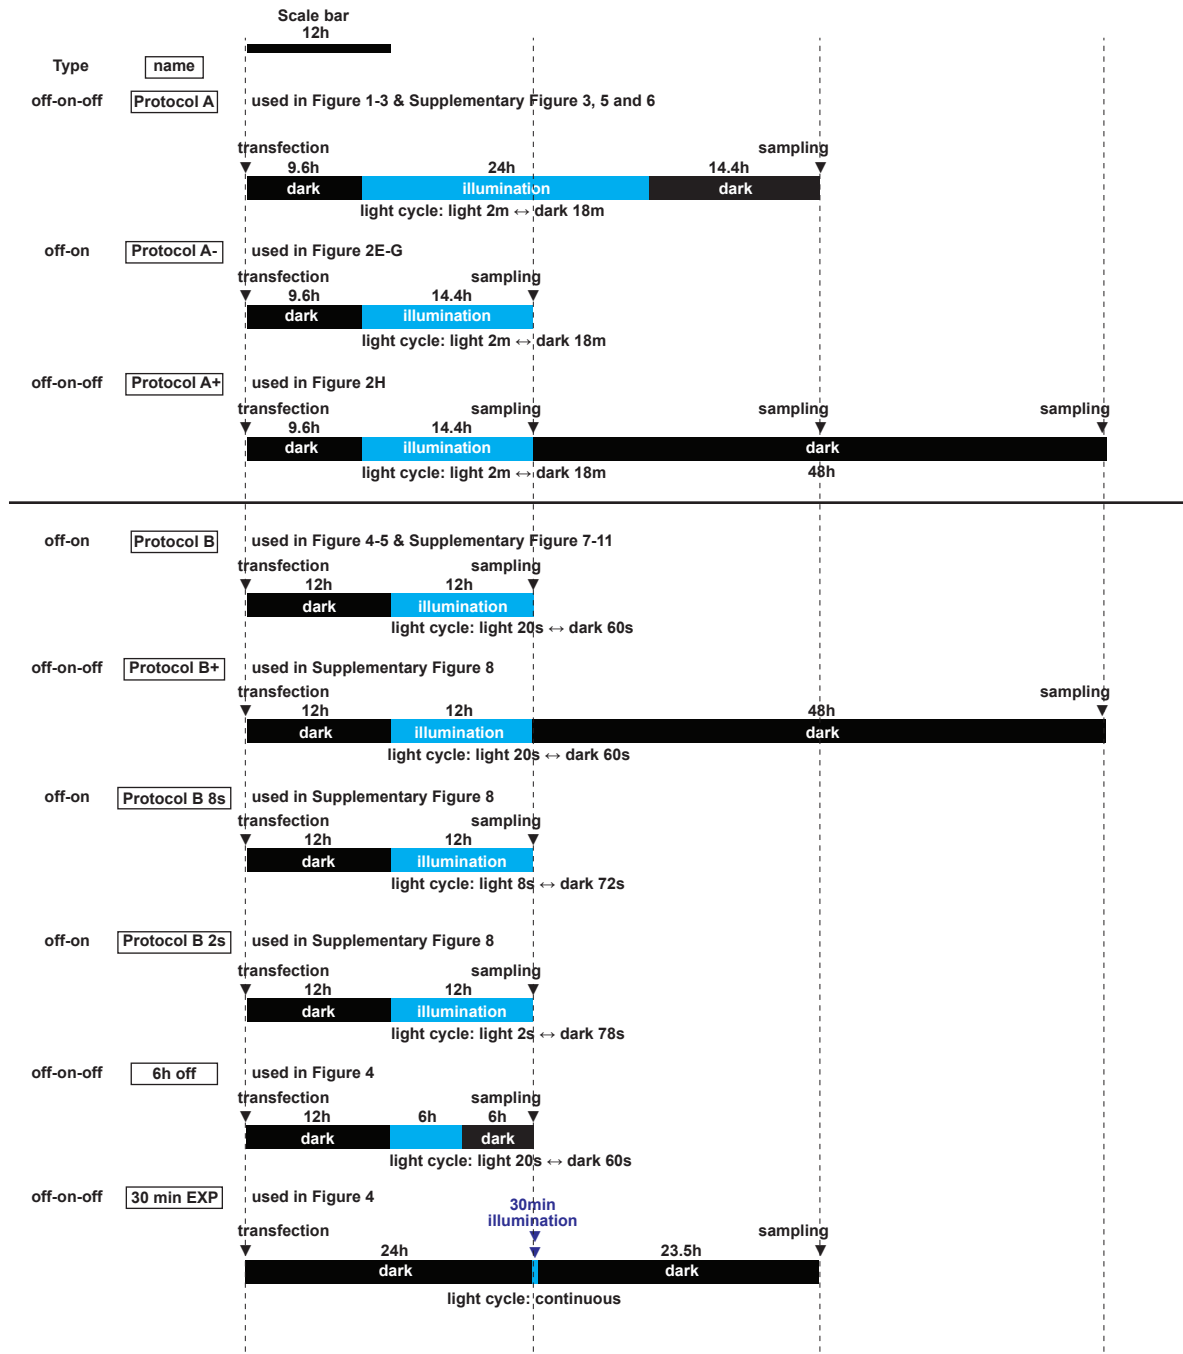

**Plasmid Summary:**

**pcDNA3-NLS-Gal4DBD-dFKF1(N-LOV, H105L)-HA v.2 (clone #13)**

(Cloning) KpnI

Kozak

(ATG): Start

Red: NLS

Blue: Gal4 DNA binding domain (Gal4DBD)

NotI

Red: dFKF1(N-LOV, H105L)

gct: linker

Blue: HA-tag, TACCCATACGATGTTCCAGATTACGCT

(TAG): STOP

(Cloning) XbaI

(sequence)

gacggatcgggagatctcccgatcccctatggctgactctcagtacaatctgctctgatgccgcatagtaagccagatctgctccctgctt  
gtgtgtggaggctgctgagtagtgcgagcaaaatthaagctacaacaaggcaaggcttgaccgacaattgcatgaagaatctgctt  
agggttaggcgttttgcgctgcttcgcatgacgggacagatatacgcgtgacattgattattgactagtattataatagtaatacattacgg  
ggcattagttcatagcccataatggagttccggttacataactacggtaaatggccgctggctgaccgccaacgacccccgcc  
cattgacgtcaataatgacgtatgtcccatagtaacgcaatagggacttccattgacgtcaatgggtggactattacggtaaactgcc  
cacttggcagtacatcaagtgtatcatatgccaaagtagccccctattgacgtcaatgacggtaaatggccgctggcattatgccagt  
acatgaccttatgggacttctacttggcagtagatctacgtattagtcacgtattaccatggtgatgacgggtttggcagtagatcaatggg  
cgtggatagcgggttgactcacgggatttccaagctccacccattgacgtcaatgggagttgttttggcaccaaaatcaacgggactt  
tccaaaatgctgtaacaactccgcccattgacgcaaatgggaggttaggcgtgtacgggtgggaggtctatataagcagagctctctggc  
taactagagaaccactgcttactggcttatcgaaattaatacagactcactataggagaccaagcttggtagccacc(ATG)CC  
CAAGAAGAAGAGGAAGGTGAAGCTACTGTCTTCTATCGAACAAGCATGCGATATTTGCCGAC  
TAAAAAGCTCAAGTGCTCCAAAGAAAAACCGAAGTGCGCCAAGTGTCTGAAGAACAACCTGG  
GAGTGTGCTACTCTCCAAAACCAAAGGTCTCCGCTGACTAGGGCACATCTGACAGAAG  
TGGAATCAAGGCTAGAAAGACTGGAACAGCTATTTCTACTGATTTTTCTCGAGAAGACCTT  
GACATGATTTTGAAAATGGATTCTTTACAGGATATAAAAGCATTGTTAACAGGATTATTTGTAC  
AAGATAATGTGAATAAAGATGCCGTCACAGATAGATTGGCTTCAGTGGAGACTGATATGCCT  
CTAACATTGAGACAGCATAGAATAAGTGCACATCATCGGAAGAGAGTAGTAACAAAGG  
TCAAAGACAGTTGACTGTATCGCCggcggccgcaGCGAGAGAACATGCGATCGGAGAAGCCAC  
CGGAAAACGAAAGAAACGCGGCAGAGTTGAAGAAGCAGAAGAATACTGTAACGATGGAATC  
GAAGAACAAGTAGAGGATGAGAAGCTTCCGTTAGAGGTTGGGATGTTCTATTACCCAATGAC  
TCCGCTTCGTTTATTGTTTCCGATGCTCTGGAGCCAGATTTTCTTTGATCTATGTCAACAG  
AGTCTTCGAAGTCTTCACTGGCTATCGTGCCGATGAAGTTCTTGGTCGTAACGTGCGATTCC



TACAGTACAGAGATCCTCGAGCTCAAAGGCGTctCCATTGGTTGATCCTGTGGTTGTATCT  
GAGATTAGGAGATGTCTTGAAGAAGGTATTGAATTCCAAGGAGAGCTTCTTAATTTAGAAAA  
GATGGTACTCCTTTGGTTAACAGACTACGGCTTGCTCCAATACGTGACGATGATGGAACCAT  
TACACACGTAATTGGGATACAGGTCTTCTCTGAAACGgctTACCCATACGATGTTCCAGATTAC  
GCT(TAG)tctagagggccctattctatagtgacacctaagtctagagctcgtgatcagcctcgactgtgccttctagttgccagccat  
ctgtgtttgccccccccgctcctcctgaccctggaagtgccactcccactgtccttctcctaataaaatgaggaaattgcatcgattgt  
ctgagtaggtgctattctattctgggggtgggggtggggcaggacagcaaggggaggattgggaagacaatagcaggcatgctggg  
gatgcggtgggctctatggctctgaggcggaaagaaccagctggggctctagggggtatcccacgcgcccctgtagcggcgattaa  
gcbgcbgggtgtggtggttacgcbgagcgtgaccgctacactgcccagcgccttagcggcctcttctccttctccttctcctg  
ccagctcgcggcttccccgcaagctctaaatcggggcatcccttagggctcggatttagtcttaccgacacctgacccccaaaaa  
cttgattagggtaggttacagtagtgggcatcgccctgatagacggttttcggcctttagcgttggagtcacgcttcttaatagtgact  
ctgttccaaactggaacaacactcaaccctatctcggctattctttgattataagggattttgggatttcggcctattggttaaaaaatga  
gctgatttaaaaaatftaacgcgaattaattctgtggaatgtgtgctagttagggtgtggaagtcaccagctcccaggcaggcag  
aagtagcaagcatgcatctcaattagtcagcaaccaggtgtggaagtcaccagctcccagcaggcagaagtagcaaaagcat  
gcatctcaattagtcagcaaccatagctccgcccctaactccgcccataccgcccctaactccgcccagctccgcccattctccgccc  
ggctgactaatTTTTTattatgacagaggccgaggccgctctgctctgactattccagaagtagtgaggaggctTTTTggaggcctag  
gctttgcaaaaagctccgggagctgtatatacattttcggatctgatcaagagacaggatgaggatcgttccgatgttgaacaagat  
ggattgacgcagggtctccggccgctgggtggagaggctattcggctatgactgggcacacagacaatcggctgctctgatccgc  
cgtgtccggctgctcagcgcagggcgcccggctcttttgcgaagaccgactgctcgggtgcctgaaatgaactgaggacgaggcag  
cgcggctatcgtgctgcccacgacggcgcttcttgcgagctgtgctcagctgactgaagcgggaagggactggctgctattgg  
gcaagtgccgggagggatctcctgtcatctcactgtcctcggagaaagatccatcatggctgatgcaatgcccggctgcata  
cgctgatccggctacctgcccattcgaccaccaagcgaacatcgcatcgagcagcagctactcggatggaagccggctctgtcgtat  
caggatgatctggcgaagagcatcaggggctcgcgcccagccgaactgtccaggtcaaggcgcgatcccagcggcgagg  
atctcgtcgtgacctatggcgtgctgctgccaatatcatggtggaatggccgctttctgattcatcactgtggccggctgggtg  
tggcggaccgctacaggacatagcgttggctaccgctgatattgctgaagagctggcggcgaatggctgaccgcttctcgtgctta  
cggatcgcggctcccgattcgcagcgcacgcttctatgcttctgacgattctctgagcgggactctggggtcgaatgaccga  
ccaagcgcgcccacactgcccacagatctcagattccaccgccccttctatgaaagggtgggcttcggaatcgtttccgggagc  
cggctggatgatctccagcgcgggatctcatgctggagtctcgcacccccactgtttattgacgttataatggttacaataaag  
caatagcatcaaaattcacaataaagcatttttactgcattctagttgtggtttgtccaaactcatcaatgatcttcatgctctgatac  
cgtcagcctctagctagagcttggcgtaatcatggtcatagctgttctgtgtgaaattgttatccgctcacaattccacacaacatacag  
cgggaagcataaagttaaagcctgggtgctcaatgagtgagctaacacattaattgcttgcgctcactgcccgttccagctggg  
aaacctgctgcccagctgcattaatgaaatcgccaacgcgcccgggagaggggttgcgtattgggctctccgcttctcgtcact  
gactcgtcgcctcggctcgtcggctcggcgagcggatcagctcactcaaggcggtaatacggttatccacagaatcaggggataa  
cgcaggaaagaacatgtgagcaaaaggccagcaaaaggccaggaaccgtaaaaaggccgcttgcgtggcgttttccataggctcc  
gccccctgacgagcatcaaaaaatcgacgctcaagtcagaggtggcgaaccggacaggactataaagatacaggcgttccc  
cctggaagctcccctgctgctctcctgttccgacctgcccgttaccggatacctgtccgcttctccctcgggaagcgtggcgttctc  
aatgctcacgctgtaggtatctcagttcgggtgtaggtcgtcctcaagctgggctgtgtgcacgaacccccgttaccgcccagcgtg  
cgccttaccgtaactatcgtctgagccaaccggtaagacagactatcgccactggcagcagcactggtaacaggattagca  
gagcggaggtatgtagcgggtctacagattctgaagtggtggcctaactcggctacactagaaggacagtatttgatctcgcctct  
gctgaagccagttacctcggaaaaagagttgtagctctgatccggcaaaaccaccgctgtagcgggtggtttttgttgcaagc  
agcagattacgcbgcaaaaaaaggatctcaagaagatcctttgatctttctacgggtctgacgctcagtggaacgaaaactcacgtt  
aagggtatttgctagattatcaaaaaggatctcacctagatcctttaaataaaaatgaagtttaaatcaatcaaaagtatatatga  
gtaaacttgctgacagttaccaatgcttaacagtgaggcacctatctcagcgtatcttattcgttcatccatagttgcctgactccccg  
tcgttagataactacgatacgggagggcttaccatctggcccagctgctcaatgataccgagagaccacgctcaccggctccagat  
ttatcagcaataaacagccagccggaaggccgagcagaaagtgctcctgcaactttatccgctccatccagcttattaattgttc  
cgggaagctagagtaagtagttccagttaaatgctgcaacgctgttccattgctacaggcatcgtggtgtcacgctcgtctgttgg  
atggctcattcagctccggttcccaacgatcaaggcgagttacatgatccccatgtgtgcaaaaaagcgggttagctcctcggctccc  
gatcgtgtcagaagtaagttggccgaggttatcactcatggtatggcagcactgcataattctctactgcatgccatccgtaagatgc  
tttctgtgactggtgagtagtcaaccaagcttctgagaatagtgatgcccgcagcaggattgctcttcccggcgtcaatacgggataat

accgcccacatagcagaactttaaagtctcatcattggaaaacgftcttcggggcgaaaactctcaaggatcttaccgctgtgaga  
tccagttcgatgtaaccactcgtgcaccaactgatcttcagcatctttactttcaccagcgttctgggtgagcaaaaacaggaaggca  
aatgccgcaaaaaggaataagggcgacacggaaatgtgaatactcatacttctcttttcaatattattgaagcattatcagggt  
attgtctcatgagcggataca

**pcDNA3-FLAG-GI-VP16 (clone #4):**

(Cloning) EcoRI

Kozak

(ATG): Start

FLAG-tag

Red: GI

NotI & linker (agtgctggt, SAG)

Blue: VP16

(PCR template: F-type VP16 activation domain in pTet-On Advanced plasmid)

(TAA): STOP

(Cloning) XbaI

(sequence)

gacggatcgggagatctcccgatcccctatggctgactctcagtacaatctgctctgatgccgcatagttaagccagtatctgctccctgctt  
gtgtgtggaggtcgcctgagtagtgcgagcaaaatftaagctacaacaaggcaaggcttgaccgacaattgcatgaagaatctgctt  
agggttagcgcttttgcgctgcttcgcgatgtacgggacagatatacgcgtgacattgattgactagttattaatagtaatacaattacgg  
ggcattagttcatagcccatatagggagttccgcttacataacttacggtaaatggcccgcctggctgaccgccaacgacccccgcc  
cattgacgtcaataatgacgtatgtcccatagtaacgccaatagggactttccattgacgtcaatgggtggactatftacggtaaaactgcc  
cacttggcagtagcatcaagtgtatcatatgccaagtacgccccctattgacgtcaatgacggtaaattggcccgcctggcattatgccagt  
acatgaccttatgggactttcctacttggcagtagcatctacgtattagtcacgtcattaccatggtgatgcggtttggcagtagcatcaatggg  
cgtggatagcgggttgactcaggggatttccaagtctccaccctgacgtcaatgggagtttggcaccaaaatcaacgggactt  
tccaaaatgtcgaacaactccgccccattgacgcaaatgggaggtgtagcgtgggaggtctatataagcagagctctctggc  
taactagagaaccactgcttactggcttatcgaatataacgactcactatagggagaccaagcttggtagcagctcggatccact  
agtaacggccgacgtgtgctggaattcgccacc(ATG)gactacaaggacgatgacgataaagggGCTAGTTCATCTTC  
ATCTGAGAGATGGATCGATGGTCTTCAGTTCTCTTCCTTGTATGGCCTCCGCCACGAGATC  
CTCAACAACATAAGGATCAAGTCGTTGCTTATGTTGAATATTTTGGTCAATTTACATCAGAGC  
AATCCCAGATGACATTGCTGAGTTGGTCCGGCATCAGTATCCATCAACcGAGAAGCGACTT  
TTgGACGATGTGCTGGCGATGTTTGTCTTCATCATCCGGAGCATGGTCATGCAGTCATTCT  
TCCAATCATTTTCATGTCTTATTGATGGCTCGTTGGTGTACAGCAAGGAAGCTCATCCGTTTGC  
CTCTTTCATATCTTTAGTTTGCCCAAGTAGTGAGAATGACTATTCGGAGCAATGGGCTTTGGC  
ATGTGGAGAAATCCTTCGCATTTTACTCATTACAACCGTCCCATTTATAAACTGAGCAGCA  
AAATGGAGATACAGAGAGAAATTGTCTGAGCAAAGCTACAACACTAGTGGTTCTCCGACTTCAG  
AGCCTAAGGCTGGATCACCAACACAGCATGAAAGGAAACCTTTAAGGCCTTTGTCTCCATGG  
ATCAGTGATATACTACTTGGCTGCTCCTTGGTATAAGAAGTACTATTTCCGATGGTGTAGT  
GGTGTAAATGGGTAAATATGCTGCTGGAGAGCTCAAGCCGCCAACCATTGCTTCTCGAGGAT  
CTGGTAAACATCCTCAACTGATGCCTTCAACCCCAAGATGGGCTGTTGCTAATGGAGCTGGT  
GTCATACTGAGTGTGTTGTGATGATGAAGTTGCTCGATATGAGACTGCTACGCTGACAGCGGT  
CGCTGTCCCTGCACTTCTTCTTCCCGCCAACGACATCCTTAGATGAGCATCTAGTTGCTG  
GCCTTCAGCTCTTGAACCATATGCACGTTTGTTCATAGATACTATGCCATTGCAACTCAA

GTGCTACGCAGAGACTTCTTCTTGGACTCTTAGAAGCACCACCGTCGTGGGCTCCAGATGC  
ACTTGATGCTGCTGTACAGCTTGTGGAACCTTCGAGCTGCTGAAGATTATGCATCTGGTG  
TAAGGCTACCCAGGAAGCTGGATGCATTTGCACTTCTTGC GGCTATAGGAATTGCTATGTCT  
ATGAGGGCAGGTGTTGCTGCTGATGCTGCAGCCGCTTTGCTTTTCCGCATACTCTCACAGC  
CGGCACTGCTTTTTCTCCGCTAAGTCAAGTTGAGGGAGTAGAAATTCAGCACGCGCCTATT  
GGTGGCTACAGTTCAAATTACAGAAAACAGATAGAAGTTCCTGCAGCAGAAGCAACCATTGA  
AGCCACTGCCAAGGAATTGCCTCAATGCTTTGTGCTCATGGTCCTGAAGTTGAGTGGAGAA  
TTTGC ACTATATGGGAAGCTGCTTATGGTTTGATCCCTTTAAATCTTCGGCGGTTGATCTTC  
CCGAAATCATAGTTGCTACCCCACTGCAACCTCCTATCTTGT CATGGAATTTATACATTCCAC  
TCCTCAAAGTACTTGAATATCTTCACGGGGAGTCTTCGGAAGCATGCTTGATGAAAATA  
TTTGTGGCCACTGTGGAAACAATACTCAGTAGAACTTTCCGCCTGAATCTTCAGGGAAC TA  
ACCAGAAAAGCTAGATCGAGTTTTACCACAAGATCAGCGACCAAAAATCTTGCTATGTCTGA  
GCTTCGTGCTATGGTCCATGCTCTTTTTAGAATCATGCGCTGGTGTGGAATTAGCTTCAC  
GCCTACTTTTTGTTGTGTTGACTGTATGTTTAGCCATGAAGCACAGTCTAGTGGTAGCAAG  
AGACCGAGAAGTGAATATGCTAGTACTACTGAAAATATTGAGGCGAATCAACCTGTATCTAA  
CAATCAAAGTGTAAACCGTAAAAGTAGGAATGTCAAGGGACAGGGACCTGTGGCAGCATT  
GATTCATACGTTCTTGCTGCTGTTTGTGCTCTTGCCTGTGAGGTT CAGCTGTATCCTATGATC  
TCTGGTGGGGGGAACTTTTCCAATTCTGCCGTGGCTGGA ACTATTACAAAGCCTGTAAAGAT  
AAATGGGTCATCTAAAGAGTATGGAGCTGGGATTGACTCGGCAATTAGTCATACGCGCCGAA  
TTTTGGCAATCCTAGAGGCACTTTTTATTAAAACCATCTTCTGTGGGGACTCCATGGAGTT  
ACAGTTCTAGTGAGATAGTTGCTGCGGCCATGGTTGCAGCTCATATTTCCGAACTGTT CAGA  
CGTTCAAAGGCCTTGACGCATGCATTGTCTGGGTTGATGAGATGTAAGTGGGATAAGGAAAT  
TCATAAAGAGCATCATCATTATATAACCTCATAGATGTT CACAGCAAAGTTGTTGCCCTCAT  
TGTTGACAAAGCTGAACCCTTGGAAGCCTACCTTAAGAATACACCGTT CAGAAGGATTCTG  
TGACCTGTTTAACTGGAAACAAGAGAACACATGTGCAAGCACCACATGCTTTGATACAGCG  
GTGACATCCGCCTCAAGGACTGAAATGAATCCAAGAGGAAACCATAAGTATGCTAGACATTC  
AGATGAAGGCTCAGGAGACCCCTCAGAGAAGGGTATCAAAGATTTCTCTTGATGCTTCTG  
ATCTAGCGAATTTCTCACAGCTGATAGACTCGCAGGGTTCTATTGTGGTACACAAAAGCTTT  
TGAGGTCAGTGCTTG CAGAGAAACCGGAGCTGTCTTTCTCCGTTGTTTCACTGTTATGGCAC  
AACTGATTGCTGCTCCTGAAATCCAGCCACCGCAGAAAGCACCTCTGCGCAACAAGGAT  
GGAGACAGGTTGTTGATGCGCTATGCAATGTGCTATCTGCAACGCCAGCGAAAGCAGCAGC  
AGCAGTTGTCCTTCAGGCTGAAAGGGAGTTGCAGCCTTGGATCGCCAAAGATGATGAAGAA  
GGCCAAAAATGTGGAAAATCAACCAACGGATAGTCAAAGTGTGGTGGA ACTCATGCGCAA  
TCATGACAGGCCTGAGTCACTGGTGATTCTCGCAAGTGCATCAGATCTTCTTCTGCGGGCAA  
CTGATGGAATGCTTGTTGATGGAGAAGCTTGACATTACCTCAACTTGAGCTACTTGAAGCC  
ACGGCAAGAGCAATACAGCCGGTGCTAGCTTGGGGGCCATCTGGACTAGCAGTGGTCGAC  
GGTTTATCCAATCTATTGAAGTGTGCTTACCAGCAACAATACGGTGCCTTT CACACCCAAGT  
GCACACGTACGTGCCTTAAGCACGT CAGTACTACGTGATATCATGAACCAAAGCTCCATACC  
CATCAAAGTAACTCCAAA ACTGCCAACAACAGAGAAGAACGGAATGAATAGTCCGTCCATC  
GATTCTTCAACGCCGCCTCAATAGACTGGAAAGCCGATATCCAAA ACTGTTTAACTGGGAA  
GCTCACAGCTTGCTCTCCACA ACTATGCCTACTCAGTTTCTCGACACTGCGGCTCGGGA ACT  
CGGCTGTA CTATATCCTTGTCCAAgcggccgcaagtgtggtGAAAGCGGCGGGCCGGCCGACGC  
CCTTGACGATTTTGACTTAGACATGCTCCAGCCGATGCCCTTGACGACTTTGACCTTGATA  
TGCTGCCTGCTGACGCTCTTGACGATTTTGACCTTGACATGCTCCCCGGG(TAA)tctagaggcc  
ctattctataggtcacctaaatgctagagctcgtgatcagcctcgactgtgccttctagttgccagccatctgttggccctccccgtg  
ccttccttgaccctggaagtgccactcccactgtccttccataaaaatgaggaaattgcatcgattgtctgagtaggtgtcattctattct  
gggggtggggggggcaggacagcaagggggaggattgggaagacaatagcaggcatgctggggatgctggtggctctatggt  
tctgaggcggaagaaccagctgggctctaggggtatccccacgcccctgtagcggcgattaagcgcggcggggtgtggtggt  
acgcgacgctgaccgtacactgcccagcgcctagcggcctcttctcccttctccttctcgcacgttcgcccgttcccc

gtcaagctctaaatcggggcatcccttagggttccgatttagtgctttacggcacctcgacccccaaaaacttgattaggggatggttcac  
glagtgggccatcgccctgatagacgggttttcgccccttgacgttggagtcaccgttcttaatagtgactctgttccaaactggaacaac  
actcaaccctatctcggctattctttgattataagggattttggggatttcggcctattggttaaaaaatgagctgatttaacaaaaatfaac  
gcaattaattctgtggaatgtgtcagtaggggtgtgaaagtccccaggctcccaggcaggcagaagatgcaaagcatgcatctc  
aattagtcagcaaccagggtgtgaaagtccccaggctcccagcaggcagaagatgcaaagcatgcatctcaattagtcagcaacc  
atagtcggccctaaactccgcccctcccggccctaaactccgcccagttccgcccattctccgccccatggctgactaattttttatfatgc  
agaggccgaggccgctctgctctgagctattccagaagtagtgaggaggctttttggaggcctaggcttttcaaaaagctccggg  
agctgtatataccatttcggatctgatcaagagacaggatgaggatcgtttcgcatgattgaacaagatggattgcaacgcagggttccgg  
ccgctgggtggagaggctattcggctatgactgggcacaacagacaatcgctgctctgatgcccggctgttccggctgctcagcgcag  
gggcccgggtctttttgcaagaccgacctgtccgggtccctgaatgaactgcaggacgaggcagcgcggctatcgtggctggccac  
gacggcgcttcttgcagctgtgctcagctgttactgaagcgggaagggactggctgctattgggcaagtgccggggcaggat  
ctcctgtcatctcacctgtcctgcccagaaagatccatcatggctgatgcaatgcccggctgcatacgttgatccggctacctgccc  
attcgaccaccaagcgaaacatcgcatcgagcagcagcactcggatggaagccggcttctgctatcaggatgatctggacgaaga  
gcatcaggggctcgcgcccagccgaactgttcgcccaggctcaaggcgcgatgcccgacggcaggatctcgtcgtgacctatggcg  
atgctcgttgcgcaatacatggtgaaaatggccgcttttctggattcatcgactgtggccggctgggtgtggcggaccgctatcagga  
catagcgttggctaccgctgatattgctgaagacttggcggcgaatgggctgaccgcttctcgtgctttacggatcgcgctcccgat  
cgacgcatcgcttctatcgcttctgacgagttctctgagcgggactctgggttcgaaatgaccgaccaagcgcagcccaacct  
gccatcacgagatttcgattccaccgccccttctatgaaaggtgggcttcggaatcgtttccgggacgcccggctggatgatcctccagc  
gcccggatctcatgctggagttcttcgcccaccccaactgtttattgcagcttataatggttacaataaagcaatagcatcacaattca  
caataaagcatttttctcagctattctagtgtggtttgtccaaactcatcaatgatctatcatgctgtataccgctgacctctagtagag  
cttggcgtaatcatggtcatagctgtttctgtgtgaaattgttatccgctcacaattccacacaacatacagaccggaagcataaagtga  
aagcctgggtgcccataatgagtgagtaactcacattaatgctgtcgtcactgcccgttccagtcgggaaacctgtcgtccagct  
gcattaatgaatcgcccaacgcgcggggagaggcgggttgcgtattggcgctcttccgcttctcgtcactgactcgtcgcctcggct  
gttcggctcggcgcgagcggatcagctcactcaaaggcggtaatacggttatccacagaatcaggggataacgcaggaaagaacatg  
tgagcaaaaggccagcaaaaggccaggaaccgtaaaaaggccgctgtgctggcttttccataggctccgccccctgacgagcat  
cacaataatcgacgctcaagtcagaggtggcgaaccgacaggactataaagataaccaggcgttccccctggaagctccctcgtg  
cgtctcctgttccgacctgcccgttaccggatacctgtccgcttctcccttcgggaagcgtggcgcttttcaatgctcacgctgtaggt  
atctcagttcgggtgtaggtcgttcgctcaagctgggctgtgtgacgaacccccgttcagcccgaccgctcgccttatccggtaactat  
cgtcttgagccaaccggtaagacacgacttatcgccactggcagcagccactgtaacaggattagcagagcagggatgttagggc  
gtgctacagagttctgaaagtggtggcctaactacggctacactagaaggacagtaatttggtatctgcgctcgtctgaagccagttacctc  
ggaaaaagagttgtagctcttgatccggcaaaacaaccaccgctgtagcgggtgttttttggcaagcagcagattacgcgaga  
aaaaaaggatcgaagaagatcctttgatctttctacgggtctgacgctcagtggaacgaaaactcacgtaagggttttggctatga  
gattatcaaaaaggatcttcaactagatcctttaaataaaaaatgaagtttaatacaatcaaaagtatatatgagtaaaactggctgacag  
ttaccaatgcttaacagtgaggcacctatctcagcgtatctgtctatttcggtcatccatagttgctgactccccgctgtagataactacga  
tacgggagggttaccatctggccccagtgctgcaatgataccgagaccacgctcaccggctccagattatcagcaataaacca  
gccagccggaaggccgagcgcagaagtgctcctgcaactttatccgctccatccagcttattaattgttccgggaagctagagtaa  
gtagttccagtaataatgttgcgcaacgttgtccattgctacagggatcgtggtgtcacgctcgtcgtttggatggcttaccagctccg  
gttccaacgatcaaggcgattacatgatccccatgtgtgcaaaaaagcggtagctcctcggctcctccgatcgtgtcagaagtaa  
gttggccgagtgattactcatggtatggcagcactgcataattcttactgtcatccatccgtaagatgcttttctgactggtgagta  
ctcaaccaagctattctgagaatagtgatgcccgcagcaggtgtcttccggcgtcaatacgggataataccgcccacatagca  
gaactttaaagtgctcatattgaaaacgttctcggggcgaaaaactcgaaggatctaccgctgttgagatccagttcagatgaacc  
actcgtgacccaactgatcttcagcatctttactttaccagcgtttctgggtgagcaaaaacaggaaggcaaaatgcccgaaaaaag  
ggaataaggcgacacggaaatgtgaataactcactcttcttttcaatattgaagcattatcagggtattgtctatgagcggata  
ca

**pcDNA3-CRY2-VP16**

(Cloning) KpnI

Kozak

(ATG): Start

Red: CRY2

NotI & linker (agtgctggt, SAG)

Blue: VP16

(TAA): STOP

(Cloning) XbaI

(sequence)

gacggatcgggagatctcccgatcccctatggctcgactctcagtacaatctgctctgatgccgcatagtaagccagatctgctccctgct  
gtgtgtggaggctcgtgtagtagtgcgagcaaaaattagctacaacaaggcaaggcttgaccgacaattgcatgaagaatctgct  
agggttagcgctttgctgctcgcgatgtacggccagatatacgcgttgacattgattgactagtattaatagtaataattacgg  
ggcattagttcatagccatataatggagttccgcttacataactacggtaaatggcccgcctggctgaccgccaacgacccccgcc  
cattgacgtcaataatgacgtatgtcccatagtaacgccaatagggactttccattgacgtcaatgggtggacttaccggtaaactgcc  
cacttggcagtacatcaagtgatcatatgccaaagtagccccctattgacgtcaatgacggtaaatggcccgcctggcattatgccagt  
acatgacctatgggactttctacttggcagtagatctacgtattagtcacgctattaccatgggtatgctggtttggcagtagatcaatgg  
cgtggatagcgggttgactcaggggatttccaagctccacccattgacgtcaatgggagttgtttggcaccaaaatcaacgggactt  
tccaaaatgctgaacaactccgccccattgacgcaaatgggaggtaggctgtacggtagggaggctatataagcagagctctctggc  
taactagagaaccactgcttactggcttatcgaattaatacagactcactataggagaccaagcttggtaccGCCACC(ATG)  
AAGATGGACAAAAAGACTATAGTTTGGTTTGAAGAGACCTAAGGATTGAGGATAATCCTGCAT  
TAGCAGCAGCTGCTCACGAAGGATCTGTTTTTCTGTCTTCATTTGGTGTCCTGAAGAAGAAG  
GACAGTTTTATCCTGGAAGAGCTTCAAGATGGTGGATGAAACAATCACTTGCTCACTTATCTC  
AATCCTTGAAGGCTCTTGGATCTGACCTCACTTTAATCAAACCCACAACACGATTTACGCGA  
TCTTGGATTGTATCCGCGTTACCGGTGCTACAAAAGTCGTCTTAACCACCTCTATGATCCTGT  
TTCGTTAGTTCCGGACCATAACCGTAAAGGAGAAGCTGGTGGAACGTGGGATCTCTGTGCAAA  
GCTACAATGGAGATCTATTGTATGAACCGTGGGAGATATACTGCGAAAAGGGCAAACCTTTTA  
CGAGTTTCAATTCTTACTGGAAGAAATGCTTAGATATGTCGATTGAATCCGTTATGCTTCTCC  
TCCTTGGCGGTTGATGCCAATAACTGCAGCGGCTGAAGCGATTTGGGCGTGTTCGATTGAAG  
AACTAGGGCTGGAGAATGAGGCCGAGAAACCGAGCAATGCGTTGTTAACTAGAGCTTGGTCT  
CCAGGATGGAGCAATGCTGATAAGTTACTAAATGAGTTCATCGAGAAGCAGTTGATAGATTATG  
CAAAGAACAGCAAGAAAAGTTGTTGGGAATTCTACTTCACTACTTTCTCCGTATCTCCATTTCCG  
GAAATAAGCGTCAGACACGTTTTCCAGTGTGCCCGGATGAAACAATTATATGGGCAAGAGA  
TAAGAACAGTGAAGGAGAAGAAAGTGCAGATCTTTTTCTTAGGGGAATCGGTTTAAAGAGAGTA  
TTCTCGGTATATATGTTTCAACTTCCCCTTACTCACGAGCAATCGTTGTTGAGTCATCTTCGG  
TTTTTCCCTTGGGATGCTGATGTTGATAAGTTCAAGGCCTGGAGACAAGGCAGGACCGGTTA  
TCCGTTGGTGGATGCCGGAATGAGAGAGCTTTGGGCTACCGGATGGATGCATAACAGAATAA  
GAGTGATTGTTTCAAGCTTTGCTGTGAAGTTTCTTCTCCTTCCATGGAATGGGGAATGAAGT  
ATTTCTGGGATACACTTTTGGATGCTGATTTGGAATGTGACATCCTTGGCTGGCAGTATATCTC  
TGGGAGTATCCCCGATGGCCACGAGCTTGATCGCTTGGACAATCCCGCGTTACAAGGCGCC  
AAATATGACCCAGAAGGTGAGTACATAAGGCAATGGCTTCCCGAGCTTGGCAGATTGCCAAC  
TGAATGGATCCATCATCCATGGGACGCTCCTTTAACCGTACTCAAAGCTTCTGGTGTGGAAC  
CGGAACAACTATGCGAAACCCATTGTAGACATCGACACAGCTCGTGAGCTACTAGCTAAAGC  
TATTTCAAGAACCCGTGAAGCACAGATCATGATCGGAGCAGCACCTGATGAGATTGTAGCAGA

TAGCTTCGAGGCCTTAGGGGCTAATACCATTAAAGAACCTGGTCTTTGCCCATCTGTGTCTTC  
TAATGACCAACAAGTACCTTCGGCTGTTCTTACAACGGGTCAAAGAGAGTGAAACCTGAGG  
AAGAAGAAGAGAGACATGAAGAAATCTAGGGGATTCGATGAAAGGGAGTTGTTTTGACT  
GCTGAATCTTCTTCTTCTTCGAGTGTGTTTTTCGTTTCGCAGTCTTGCTCGTTGGCATCAGAA  
GGGAAGAATCTGGAAGGTATTCAAGATTCATCTGATCAGATTACTACAAGTTTGGGAAAAATG  
GTTGCAAAGCGGCCGCAAGTGTGGTGAAGCGCGCGGGCCGGCCGACGCCCTTGACGATTTTACT  
TAGACATGCTCCAGCCGATGCCCTTGACGACTTTGACCTTGATATGCTGCCTGCTGACGCT  
CTTGACGATTTTACTGCTGACATGCTCCCCGGG(TAA)tctagagggccctattctatagtgacctaagtctag  
agctcgctgatcagcctcgactgtgcttctagttgccagccatctgttggccctccccctgcctcctgaacctggaagggtccact  
cccactgtccttctaataaaaatgaggaaatgcatcgcattgtctgagtaggtgctattctatctgggggggggggggggaggacag  
caagggggaggattgggaagacaatagcaggcatgctgggatgctgggtgctctatggctctgaggcggaaagaaccagctggg  
gctctaggggatccccacgcgacctgtagcggcgcatlaagcgcggcggtgtggtggttacgcgcagcgtgaccgctacactgac  
agcgcctagcgcgctccttctccttctccttctcgcacgcttgcgggcttccccgcaagctctaaatcggggcatccctta  
gggtccgattagtgcttacggcacctcgacccccaaaaaacttgattagggtaggttcacgtagtgggccatcgccctgatagacgg  
ttttcgcccttgacgttggagtcacgcttcttaatagtgactctgttccaaactggaacaacactcaacctatcggctctattcttggat  
tataaggatttgggatttcggcctattggtaaaaaatgagctgatttaacaaaattacgcgaattaattctgtggaatgtgtgctag  
taggctgtggaagctccagcaggctcccaggcagcagaagtagcaaaagcagcagcagcagcagcagcagcagcagcagcagcagc  
tcccagctcccagcagcagcagcagcagcagcagcagcagcagcagcagcagcagcagcagcagcagcagcagcagcagcagcagc  
cgccctaaactcgccagctccgcccattctcgccccatggctgactaattttttattatgtagagggcggagggcgcctctgctctga  
gctattccagaagtagtgaggaggcttttggaggcctaggctttgcaaaaagctcccgggagctgtatctccatttccggatctgacaa  
gagacaggatgaggatcgttctgcatgattgaacaagatggattgcagcagagttctccggcggctgggtggagaggctattcggctat  
gactgggcacaacagacaatcggctgctctgatccgctgttccggctgtagcgcaggggagggcggcggctcttttgaagaccgac  
ctgtccgggtccctgaatgaactgcaggacgaggcagcgcggctatctgtggctggccacgagggcgttccctgcgacgtgtgctg  
acgtgtcactgaagcgggaagggactggctgctattgggcaagtgccggggcaggatctctgtcatctcacctgtcctgcccgaga  
aagatccatcatggtgatgaatgcggcgctgcatacgttgcggctacctgcccattcgaccaccaagcgaacatcgcac  
gagcagcagcactcggatggaagccggtctgtcagcagcagcagcagcagcagcagcagcagcagcagcagcagcagcagcagc  
gttccgagcctcaaggcgcagcagcagcagcagcagcagcagcagcagcagcagcagcagcagcagcagcagcagcagcagcagc  
aatggccgctttctggtatcagcagcagcagcagcagcagcagcagcagcagcagcagcagcagcagcagcagcagcagcagcagc  
agagcttggcggcaatgggctgaccgctcctcgtgcttaccgtagcagcagcagcagcagcagcagcagcagcagcagcagcagc  
cgagctctcagcagcagcagcagcagcagcagcagcagcagcagcagcagcagcagcagcagcagcagcagcagcagcagcagc  
cttctatgaaaggttgggcttccgaatcgtttccgggacgcccggctggatgatctccagcgcggggatctatgctggagttctcggcc  
acccaactgtttatgtagcttataatggttacaataaagcaatagcagcagcagcagcagcagcagcagcagcagcagcagcagcagc  
gtggttctcacaactcaatgtatctatcatgtctgtataaccgtcagccttagctagagcttggcgtaatcatggtcatagctgttctgt  
gtgaaattgtatccgctcacaattccacacaacatacagcgggaagcagcagcagcagcagcagcagcagcagcagcagcagcagcagc  
tcacattaattgcttgcctcactgcccgttccagtcgggaaacctgtcgtgccaagcgtgcaatgaatcggccaacgcgagggga  
gaggcgggttgcgtattggcgcttccgcttctcgtcactgactcgtcgcctcggctggtcggctgagcagcagcagcagcagcagc  
caaaggcggtaatacgttaccacagaatcaggggataacgcaggaagaacatgtgagcaaaaggccagcaaaaggccagg  
aaccgtaaaaaggcggctgtgctggtttccataggctccgccccctgacgagcagcagcagcagcagcagcagcagcagcagcagc  
ggcgaaccgacagcagcagcagcagcagcagcagcagcagcagcagcagcagcagcagcagcagcagcagcagcagcagcagc  
gatacctgtccgcttctcctcgggaagcgtggtgcttctcaatgctcagcgtgtaggtatcagttcgggtgaggtcgtcctcaag  
ctgggctgtgacgaacccccgctcagcccagcagcagcagcagcagcagcagcagcagcagcagcagcagcagcagcagcagcagc  
ttatcgccactggcagcagcagcagcagcagcagcagcagcagcagcagcagcagcagcagcagcagcagcagcagcagcagcagc  
ctacggctacactagaaggacagcagcagcagcagcagcagcagcagcagcagcagcagcagcagcagcagcagcagcagcagcagc  
aaacaaaccaccgctgtagcgggtgttttgggttcaagcagcagcagcagcagcagcagcagcagcagcagcagcagcagcagcagc  
tttctacgggctgagcgtcagtggaacgaaactcagcttaaggatgttggctatgagattatcaaaaaggatctcacctagatccttt  
aaattaaaaatgaagtttaaatcaatcaaaagatataatgagtaaaacttggctgacagttaccaatgcttaacagtgaggcacctatc  
agcagctgtctattctgtatccatagttgctgactccccgtgctgtagataactacgatacgggagggcttaccatctgccccagtc  
tgcaatgataccgcgagaccacgctcaccggtccagattatcagcaataaaccagccagccggaaggccgagcgcagcagcagc  
ggtcctgcaacttaccgctccatccagcttataatgttgcgggaagctagagtaagtagttccagttatagtttgcgaacgtt  
ttgccattgtacagcagcagcagcagcagcagcagcagcagcagcagcagcagcagcagcagcagcagcagcagcagcagcagc  
ccccattgtgcaaaaagcgggttagctcctcggctcctccgatcgttgcagaagtaagttggcgcagcttatacactcatggtatggc  
agcactgcataattcttactgtcatgcatccgtaagatgctttctgtgactggtgagtagtactcaaccaagcattctgagaatagtgatgc  
ggcagcagcagcagcagcagcagcagcagcagcagcagcagcagcagcagcagcagcagcagcagcagcagcagcagcagcagc  
cttccggggcaaaaactcaaggatctaccgctgtgagatccagctcagatgtaaccactcgtgacccaactgatcttcagcagcttcta  
cttccaccagcgttctgggtgagcaaaaacaggaaggcaaaatgcccgaaaaagggaataaggcgcagcagcagcagcagcagcagc  
ctcactcttcttcaatattatgaagcattatcaggggtattgtctcatgagcggataca

**pcDNA3-CIB1-Gal4DBD**

(Cloning) KpnI

Kozak

(ATG): Start

Red: CIB1

NotI & linker (agtgctggt, SAG)

Blue: Gal4DBD

(TAA): STOP

(Cloning) XbaI

(sequence)

gacggatcgggagatctcccgatcccctatggctgactctcagtacaatctgctctgatgccgcatagtaagccagatctgctccctgct  
gtgtgtggaggtcgctgagtagtgcgagcaaaatlaagctacaacaaggcaaggctgaccgacaattgcatgaagaatctgctt  
agggtaggcggtttgctgctgctcgcgatgtacggccagatatacgcgtgacattgattattgactagtattaatagtaatacaattacgg  
ggcattagttcatagccatataatggagttccgcttacataactacggtaaatggcccgcctggctgaccgccaacgacccccgcc  
cattgacgtcaataatgacgtatgtcccatagtaacgccaatagggactttccattgacgtcaatgggtggactatttacggtaaacgctcc  
cactggcagtcacatcaagtgtatcatatgccagtagccttattgacgtcaatgacggtaaatggcccgcctggcattatgccagt  
acatgacctatgggactttcctacttggcagtcacatctacgtattagtcacgctattaccatgggtgatgcggtttggcagtcacatcaatggg  
cgtggatagcgggttgactcaggggatttccaagctccacccattgacgtcaatgggagttgtttggcaccaaaatcaacgggactt  
tccaaaatgctgaacaactccgccccattgacgcaaatggcggttaggcgtgacgggtgggaggtctatataagcagagctctctggc  
taactagagaaccactgcttactggcttatcgaataatacgcactcactatagggagaccaagcttgggtaccGCCACC(ATG)  
AATGGAGCTATAGGAGGTGACCTTTTGCTCAATTTTCCTGACATGTCGGTCCTAGAGCGCCA  
AAGGGCTCACCTCAAGTACCTCAATCCCACCTTTGATTCTCCTCTCGCCGGCTTCTTTGCCG  
ATTCTTCAATGATTACCGGCGGCGAGATGGACAGCTATCTTTGACTGCCGTTTTGAATCTT  
CCGATGATGTACGGTGAGACGACGGTGGAAAGGTGATTCAAGACTCTCAATTTGCCCGAAA  
CGACGCTTGGGACTGGAAATTTCAAGAAACGGAAGTTTGATACAGAGACTAAGGATTGTAAT  
GAGAAGAAGAAGAAGATGACGATGAACAGAGATGACCTAGTAGAAGAAGGAGAAGAAGAGA  
AGTCGAAAATAACAGAGCAAAACAATGGGAGCACAAAAGCATCAAGAAGATGAAACACAAA  
GCCAAGAAAGAAGAGAACAATTTCTCTAATGATTCATCTAAAGTGACGAAGGAATTGGAGAA  
AACGGATTATATTCATGTTCTGTCACGACGAGGCCAAGCCACTGATAGTCACAGCATAGCAG  
AACGAGTTAGAAGAGAAAAGATCAGTGAGAGAATGAAGTTTCTACAAGATTTGGTTCCTGGA  
TGCGACAAGATCACAGGCAAAGCAGGGATGCTTGATGAAATCATTAACTATGTTTCAGTCTCT  
TCAGAGACAAATCGAGTTCTTATCGATGAAACTAGCAATTGTGAATCCAAGCCGGATTTTG  
ATATGGATGACATTTTGGCAAAGAGGTTGCCTCAACTCCAATGACTGTGGTGCCATCTCT  
GAAATGGTTCTTTCCGGTTATTCTCATGAGATGGTTCACTCTGGTTATTCTAGTGAGATGGTT  
AACTCCGGTTACCTTCATGTCAATCCAATGCAGCAAGTGAATACCAGTTCTGATCCATTGTCA  
TGCTTCAACAATGGCGAAGCTCCTTCGATGTGGGACTCTCATGTGCAGAAATCTCTATGGCAA  
TTTAGGAGTACCGGTCATCGAGCTCGAGCTGCAGATGAATCGTAGATACgcgccgcaagtctggt  
ATGAAGCTACTGTCTTCTATCGAACAAGCATGCGATATTTGCCGACTTAAAAGCTCAAGTGC  
TCCAAAGAAAAACCGAAGTGCGCCAAGTGTCTGAAGAACAACCTGGGAGTGTGCTACTCTC



CCAAAACCAAAGGTCTCCGCTGACTAGGGCACATCTGACAGAAGTGAATCAAGGCTAGA  
AAGACTGGAACAGCTATTTCTACTGATTTTTCTCGAGAAGACCTTGACATGATTTTAAAAAT  
GGATTCTTTACAGGATATAAAAGCATTGTTAACAGGATTATTTGTACAAGATAATGTGAATAAA  
GATGCCGTCACAGATAGATTGGCTTCAGTGGAGACTGATATGCCTCTAACATTGAGACAGCA  
TAGAATAAGTGCAGACATCATCGGAAGAGAGTAGTAACAAAGGTCAAAGACAGTTGACTG  
TATCGCCG(TAA)tctagagggccctattctatagtgacacctaagtctagagctcgctgatcagcctcgactgacctctagttgc  
cagccatctgttgttggccccccccctgacctcttgacctggaagggtccactcccactgtccttccataaaaatgaggaaattgcat  
cgattgtctgagtaggtgctattctattctgggggggtgggggtggggcaggacagcaagggggaggattgggaagacaatagcaggc  
atgctggggatcggtgggtctatgctctgagggcgaagaaccagctggggcttaggggatccccacgcgcctctagcgg  
cgattaagcgcggcggtgtggtggtacgcgcagcgtgaccgctacactggcagcgccttagcggcctctctctctctct  
ccttctcggcacgttcggcgttccccgcaagctcaaatcggggcatcccttagggttcggatttagtcttacggcacctcgacc  
caaaaaactgattaggtgatggtcacgtagtggccatcgccctgatagacggttttcggccttgacgttggagtccacgttctta  
agtggactctgttccaaactggaacaacactcaaccctatctcggctattctttgattataaggattttgggattcggcctattggt  
aaaatgagctgatttaaaaaatcaacgcgaattaattctgtggaatgtgtgcagtaggggtggaaagtccccaggctccccaggc  
aggcagaagtatgcaaagcatgcatcaattagtcagcaaccaggtgtggaagtccccaggctccccagcaggcagaagtatgc  
aaagcatgcatcaattagtcagcaaccatagctcccggcctaaactccgcccataactccgcccagttccgcccattctc  
cgccccatggctgactaattttttatgatgagagccgaggccgctctgacctgagctattccagaagttagaggaggcttttgg  
aggcctaggctttgcaaaaagctcccgggagctgtatattcggatctgatcaagagacaggatgaggatcgtttcgcatgattg  
aacaagatggattgacgcaggttctccggcgttgggtggagagctattcggctatgactgggcacaacagacaatcggtgctct  
gatgccgctgttccgctgctcagcgcaggggcccgggtcttttgaagaccgacctgtccggtgcccgaatgaactgcaggac  
gaggcagcggctatcggtgctggccagcgggcttctgctcagctgtgctcagctgtgactgaagcgggaagggactggc  
tgctattggcgaagtccggggcaggatctcctgctacctctcctgctcctgagaaagtatccatcatggctgatgaatcggcgc  
gctgcatacgttgcctgctacctgcccattcgaccaccaagcgaacaatcgcatcgagcagcactcggatggaagccggt  
cttctcagcaggatgatctggacgaagagcatcaggggctcgcgcccagccgaactgtccagggctcaaggcgcgatccccgac  
ggcgaggatctcgtgacccatggcgtgctgcttgcgaataatcatggtggaagtggcggcttttctggattcagctgtggccg  
gctgggtgtggcggaccgctatcaggacatagcgttggctacccgctgattgtgaaagctggggcgaatgggctgaccgcttct  
cgtgctttacggatcggcgtcccgtcagcgcacgctctctcgccttctgacgagttctctgagcgggactctggggtcgaaa  
tgaccgaccaagcgcagcccaacctgcatcacgagattcgattccaaccgcccctctatgaaaggtgggctcggaaatcgtttccg  
ggacgcccgtggtgatcctccagcggggatctatgctggagttctcggccacccaactgtttattgacgttataatggttaca  
aataaagcaatagcatcacaatttcacaataaagcatttttactgacttctagttgtggttgcacaactcatcaatgatcttatcatg  
ctgtataccgtcagcctctagctagagcttggcgtaatcatggtcatagctgttctctgtgaaattgttatccgctcacaattccacacaac  
atacagccggaagcataaagttaaagcctgggtgctcaatgagtgagctaaactacattaatgctgtgctcactgcccgttcc  
agtcgggaaacctgctgctcagctgcatatgaatcgcccaacgcgaggggagaggcgttgcgtattgggcgctctccgcttct  
cgctcactgactcgtcgcctcgttccgctcggcggagcggatcagctcactcaagcggtaatacggttatccacagaatca  
ggggataacgcaggaaagaatgtgagcaaaagccagcaaaagccaggaaccgtaaaaagccgctgtcggcgttttcc  
ataggctccgccccctgacgagcatcacaataatcgacgctcaagtcagaggtggcgaaccgacaggactataaagatacca  
ggcgttccccctggaagctccctcgtcgcctcctctgctccgacctgcccgttacgggatacctgtccgcttctccctcgggaagcgtg  
gcttctcaatgctcagcgttaggtatctcagttcgggttaggtcgtcctcaagctgggctgtgtcacgaacccccgtcagccc  
gaccgctgcgcttatccggtactatcgtcttgatccaaccggtgaagacacgacttatcggcactggcagcagcactggtacag  
gattagcagagcaggatgtaggcgggtctacagagttctgaagtggtggcctaactacggctacactagaaggacagtattggtat  
ctgctcctgctgaagccagttacctcggaaaaagagttggtagctctgtatccggcaaaacaaccaccgctggtgagcgtgtttttg  
ttgcaagcagcagattacgcgcagaaaaaaggatctcaagaagatcctttgatctttctacggggtcagcgtcagtggaacgaaa  
actcacgtaagggtttgctatgagattcaaaaaggatctcacctagatccttttaattaaaaatgaagtttaaatcaatcaatga  
atatatgagtaaacctggtcagcagttaccaatgcttaacagtgaggcacctatctcagcgtatctgtctatttctcatccatagttgctg  
actccccgctggtgataactacgatacgggagggcttaccatctggccccagtgctgcaatgataccgagacccacgctcaccg  
gctccagatttatcagcaataaaccagccagccggaaggccgagcgcagaagtggctcgaacttatccgctccatccagcttatt  
aattgttccgggaagctagagtaagtagttccagtaatagtttgcgcaacgttgttccattgctacaggcatcgtggtgtcacgctgc  
tcgtttgatggctcattcagctccggttcccaacgatcaaggcagttacatgatccccatgttgtgcaaaaaagcggtagctcttc  
ggtcctccgatcgtgtcagaagtaagttggccgaggttatcactcatggttatggcagcactgcataattcttactgtcatgccatccgt

aagatgctttctgtgactggtagtactcaaccaagtcattctgagaatagtgtatgctggcgaccgagttgctcttgccggcggtcaatac  
gggataataccgcgccacatagcagaactttaaagtgtcatcattggaaaacgttctcgggcgaaaactctcaaggatcttaccg  
ctgttgagatccagttcgatgtaaccactcgtgcaccaactgatcttcagcatctttacttccaccagcgttctgggtgagcaaaaaca  
ggaaggcaaaatgccgcaaaaaggaataagggcgacacggaatgttgaatactcatactcttctttcaatattattgaagcatt  
atcagggttattgtctcatgagcggataca

Supplementary Table 1 A summary of FK1 NLOV mutagenesis

| No. | 1st test | 2nd test | mutation(s)                 | No. | 1st test | 2nd test | mutation(s)                   |
|-----|----------|----------|-----------------------------|-----|----------|----------|-------------------------------|
| 1   |          |          | no                          | 81  |          |          | x                             |
| 2   |          |          | G45A K135stop               | 82  |          |          | V74D                          |
| 3   |          |          | no                          | 83  |          |          | frame shift                   |
| 4   |          |          | x                           | 84  |          |          | x                             |
| 5   |          |          | G18S R134I Q163stop         | 85  |          |          | I149V                         |
| 6   |          |          | K16I                        | 86  |          |          | x                             |
| 7   |          |          | x                           | 87  |          |          | I7T D65Y T155S                |
| 8   |          |          | T155I                       | 88  |          |          | Y96C                          |
| 9   |          |          | I69F                        | 89  |          |          | V20I L62P D152V               |
| 10  |          |          | L130I                       | 90  |          |          | P54H H105L                    |
| 11  |          |          | L140stop                    | 91  |          |          | x                             |
| 12  |          |          | x                           | 92  |          |          | no                            |
| 13  |          |          | A2T G30V                    | 93  |          |          | no                            |
| 14  |          |          | no                          | 94  |          |          | no                            |
| 15  |          |          | F93Y R97S                   | 95  |          |          | no                            |
| 16  |          |          | x                           | 96  |          |          | C27S                          |
| 17  |          |          | E63V Y96N H105Y E121G K135N | 97  |          |          | x                             |
| 18  |          |          | R134stop                    | 98  |          |          | x                             |
| 19  |          |          | I57F                        | 99  |          |          | Q34H I69V                     |
| 20  |          |          | Y49H N132S                  | 100 |          |          | x                             |
| 21  |          |          | E122Q                       | 101 |          |          | R82P                          |
| 22  |          |          | R17S                        | 102 |          |          | V113A                         |
| 23  |          |          | E63stop                     | 103 |          |          | no                            |
| 24  |          |          | x                           | 104 |          |          | R19K                          |
| 25  |          |          | S55P P106Q                  | 105 |          |          | V113A                         |
| 26  |          |          | K16R F126V                  | 106 |          |          | L146H                         |
| 27  |          |          | no                          | 107 |          |          | x                             |
| 28  |          |          | G8stop                      | 108 |          |          | no                            |
| 29  |          |          | E38K A83V                   | 109 |          |          | K39E T79N                     |
| 30  |          |          | I57N F75L D152H             | 110 |          |          | K13STOP                       |
| 31  |          |          | no                          | 111 |          |          | x                             |
| 32  |          |          | x                           | 112 |          |          | M46T D152N                    |
| 33  |          |          | x                           | 113 |          |          | no                            |
| 34  |          |          | E36V I57F                   | 114 |          |          | x                             |
| 35  |          |          | no                          | 115 |          |          | I7F V71D F93I N142K           |
| 36  |          |          | R97stop                     | 116 |          |          | R3S A61V E125K                |
| 37  |          |          | V113I                       | 117 |          |          | K135T                         |
| 38  |          |          | E76V N90I P99H              | 118 |          |          | R14G Y96STOP                  |
| 39  |          |          | T138A                       | 119 |          |          | H105R R145Q                   |
| 40  |          |          | E33A Y70F I116M             | 120 |          |          | x                             |
| 41  |          |          | L146H                       | 121 |          |          | L68STOP                       |
| 42  |          |          | x                           | 122 |          |          | I124V                         |
| 43  |          |          | V86L                        | 123 |          |          | no                            |
| 44  |          |          | V44D                        | 124 |          |          | H5R E21D I57F P67H F75I G123D |
| 45  |          |          | no                          | 125 |          |          | F47Y E76V                     |
| 46  |          |          | K15R                        | 126 |          |          | no                            |
| 47  |          |          | R143K                       | 127 |          |          | F75I P139H                    |
| 48  |          |          | K39M F56I                   | 128 |          |          | no                            |
| 49  |          |          | x                           | 129 |          |          | E129G                         |
| 50  |          |          | E21D P50T R145G D152V       | 130 |          |          | Y49F F165L                    |
| 51  |          |          | E43D                        | 131 |          |          | R117K                         |
| 52  |          |          | P54H G137C                  | 132 |          |          | x                             |
| 53  |          |          | F66Y D98E                   | 133 |          |          | no                            |
| 54  |          |          | I31T                        | 134 |          |          | K15R L62Q Q102H               |
| 55  |          |          | x                           | 135 |          |          | frame shift                   |
| 56  |          |          | D152V                       | 136 |          |          | E38G                          |
| 57  |          |          | x                           | 137 |          |          | V20A V35E                     |
| 58  |          |          | x                           | 138 |          |          | G45W                          |
| 59  |          |          | x                           | 139 |          |          | E22V L120I                    |
| 60  |          |          | R118G                       | 140 |          |          | x                             |
| 61  |          |          | x HA tag stop               | 141 |          |          | E24K                          |
| 62  |          |          | frame shift                 | 142 |          |          | x                             |
| 63  |          |          | frame shift                 | 143 |          |          | I31N D60E E125D               |
| 64  |          |          | x                           | 144 |          |          | E43D                          |
| 65  |          |          | x                           | 145 |          |          | E22G C27F Q34L C119STOP E122D |
| 66  |          |          | A10T R19I E25G F47L E76V    | 146 |          |          | E38D F93Y R117G R145Q         |
| 67  |          |          | x                           | 147 |          |          | no                            |
| 68  |          |          | P54L                        | 148 |          |          | F93Y F126I                    |
| 69  |          |          | R14L P67L D136V             | 149 |          |          | no                            |
| 70  |          |          | M51V L140S                  | 150 |          |          | I7F                           |
| 71  |          |          | D109V                       | 151 |          |          | E21STOP V77A L94I L144P H158  |
| 72  |          |          | x                           | 152 |          |          | no                            |
| 73  |          |          | K16I M46L                   | 153 |          |          | no                            |
| 74  |          |          | Y70N                        | 154 |          |          | N28Y V112G                    |
| 75  |          |          | x                           | 155 |          |          | x                             |
| 76  |          |          | x                           | 156 |          |          | x                             |
| 77  |          |          | frame shift                 | 157 |          |          | D84E                          |
| 78  |          |          | A1V Y81H D84Y E85G          | 158 |          |          | D84G R150C S166Y              |
| 79  |          |          | no                          | 159 |          |          | frame shift                   |
| 80  |          |          | x                           | 160 |          |          | x                             |

low background  
 slightly low background  
 higher background  
 x: sequencing failed or no insertion  
 no: no mutations  
 the same mutations exist in other mutants  
 Further tests with illuminaion

**Supplementary Table 2 Comparison of the light-inducible systems**

|                                            | <b>NLOV (H105L)/GI</b> | <b>CRY2/CIB1</b>      | <b>VVD (LightOn)</b>   | <b>EL222</b>        |
|--------------------------------------------|------------------------|-----------------------|------------------------|---------------------|
| dark (Firefly/Renilla, mean $\pm$ s.d.)    | 0.0278 $\pm$ 0.0049    | 0.5673 $\pm$ 0.1308   | 9.2291 $\pm$ 1.0259    | 0.1019 $\pm$ 0.0075 |
| dark (relative, normalized to NLOV dark )  | 1.0                    | 20.4                  | 332.0                  | 3.7                 |
| light (Firefly/Renilla, mean $\pm$ s.d.)   | 2.5369 $\pm$ 0.4886    | 56.3632 $\pm$ 12.2315 | 162.2991 $\pm$ 29.8400 | 1.1729 $\pm$ 0.1783 |
| light (relative, normalized to NLOV dark ) | 91                     | 2,027                 | 5,838                  | 42                  |
| fold-induction with light                  | 91                     | 99                    | 17.6                   | 11.5                |
|                                            | ratio 1:1              | ratio 5:1             |                        |                     |

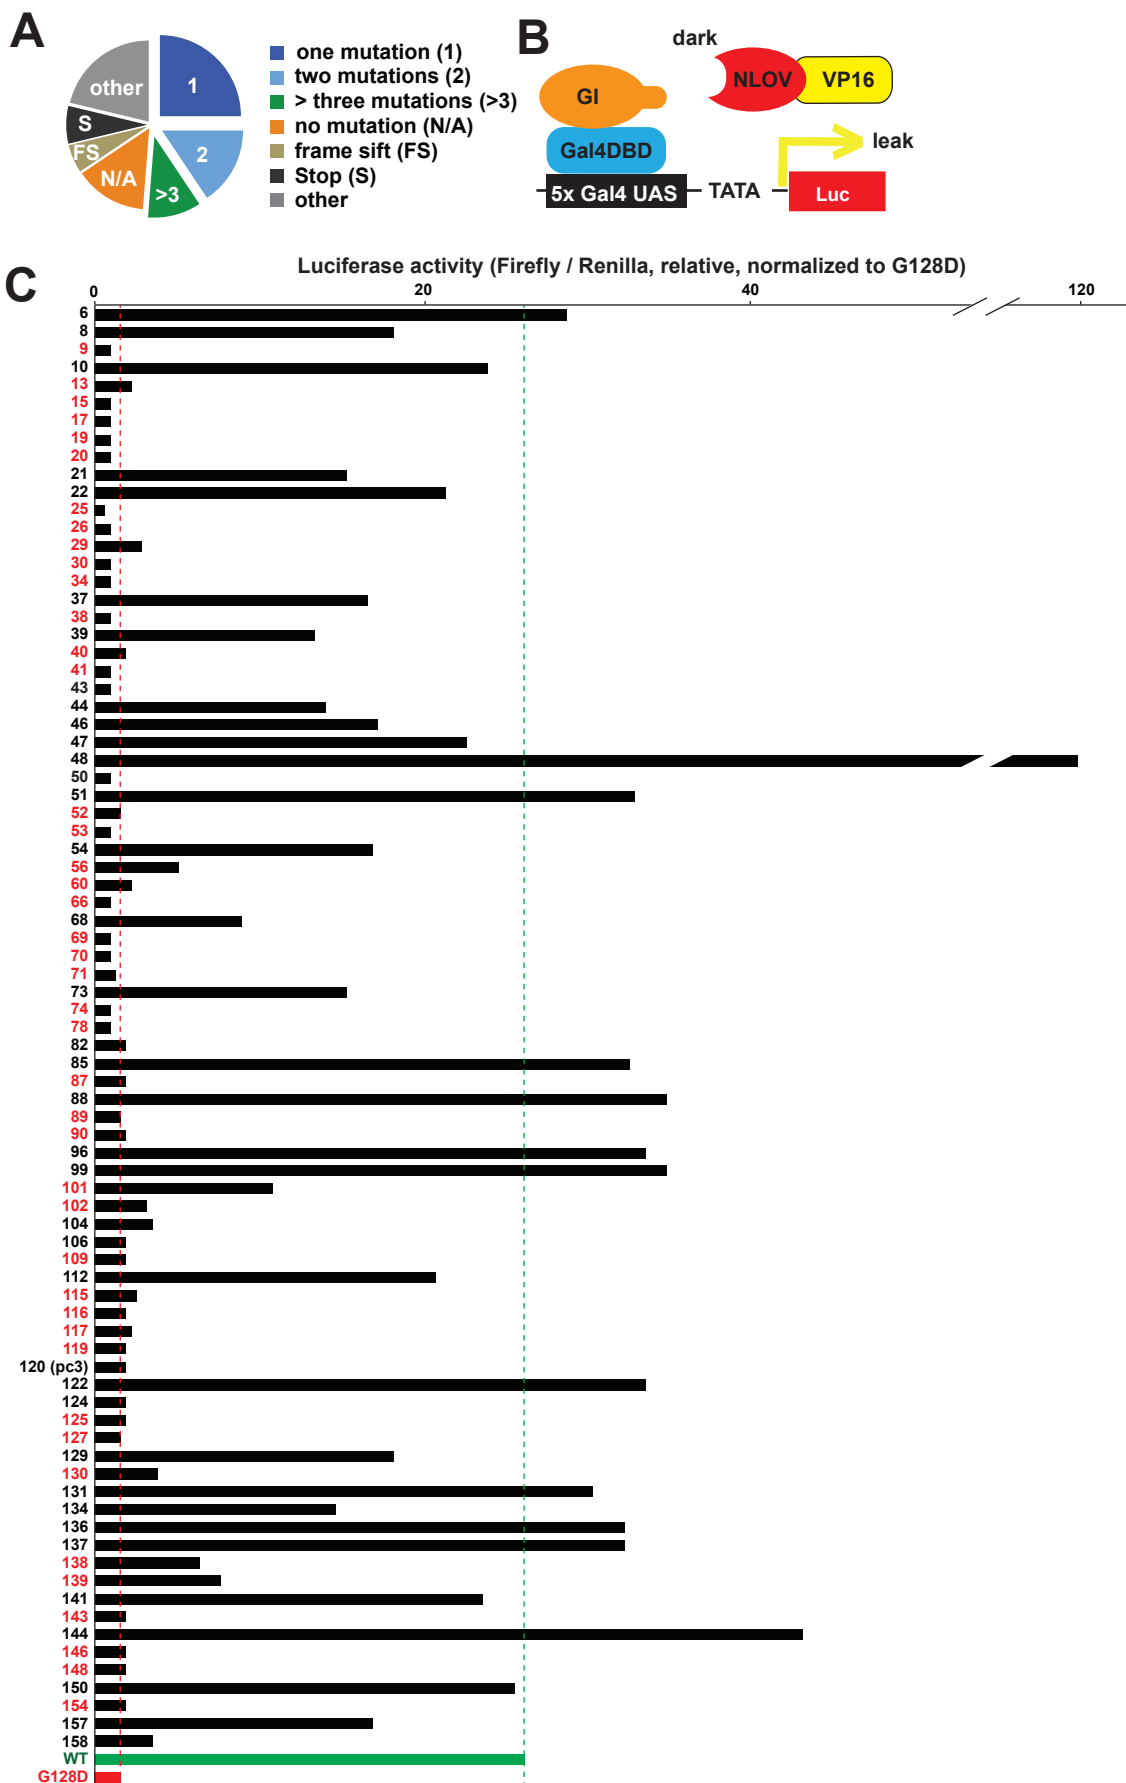

Supplementary Figure 1 Mutant screens of FKF1 under dark.

(A) A summary of FKF1 (NLOV) mutagenesis ( $n=160$ ). (B) Schematic representation of mutant tests using NLOV-VP16 and GI-Gal4DBD constructs in the dark. (C) A summary of Luc assay using 81 mutant candidates under the dark conditions. Forty five samples (red numbers) showed low background ( $n=1-2$ ). The G128D mutant (red column and dashed line) and wild-type (WT, green) were used as controls. #120 was an empty vector (pc3, pcDNA3).

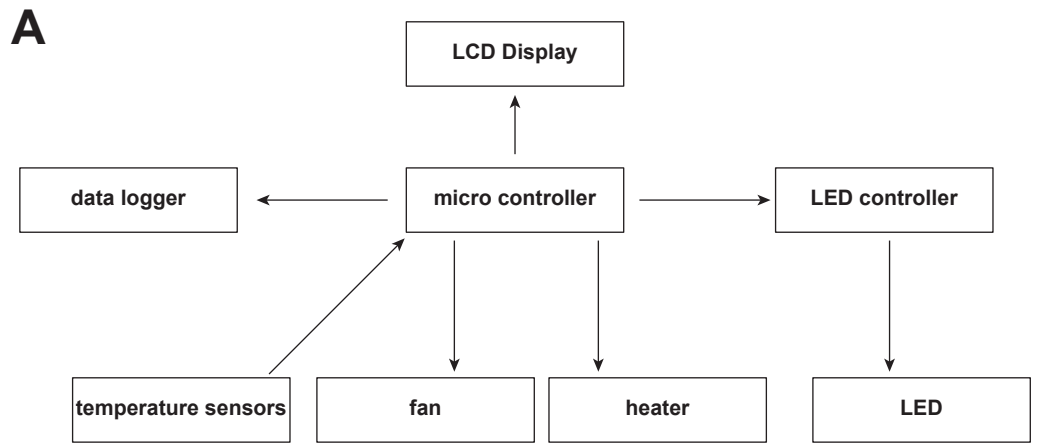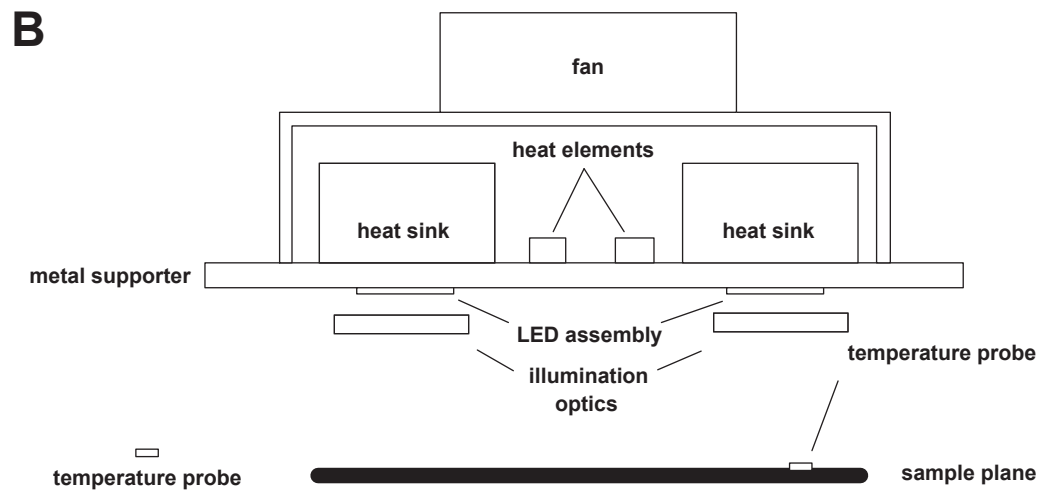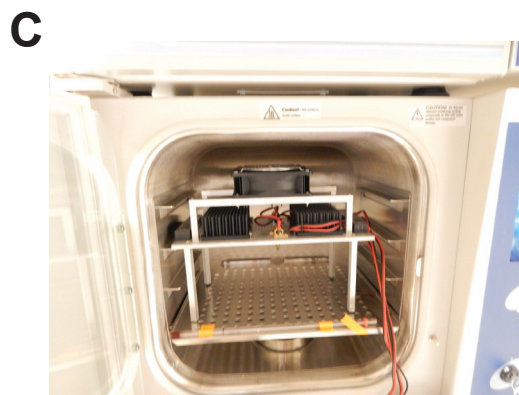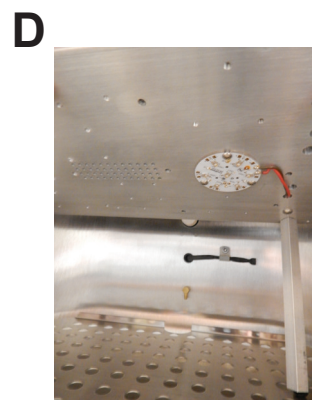

**Supplementary Figure 2 Developing an illumination system in culture incubator.**

A block diagram (A) and a sketch (B) of our blue LED illuminator are shown. The illuminator was installed into a CO<sub>2</sub> incubator (C) that enables precise control of temperature, CO<sub>2</sub> and blue LED illumination (D), 447.5 nm, 0.5 mW).

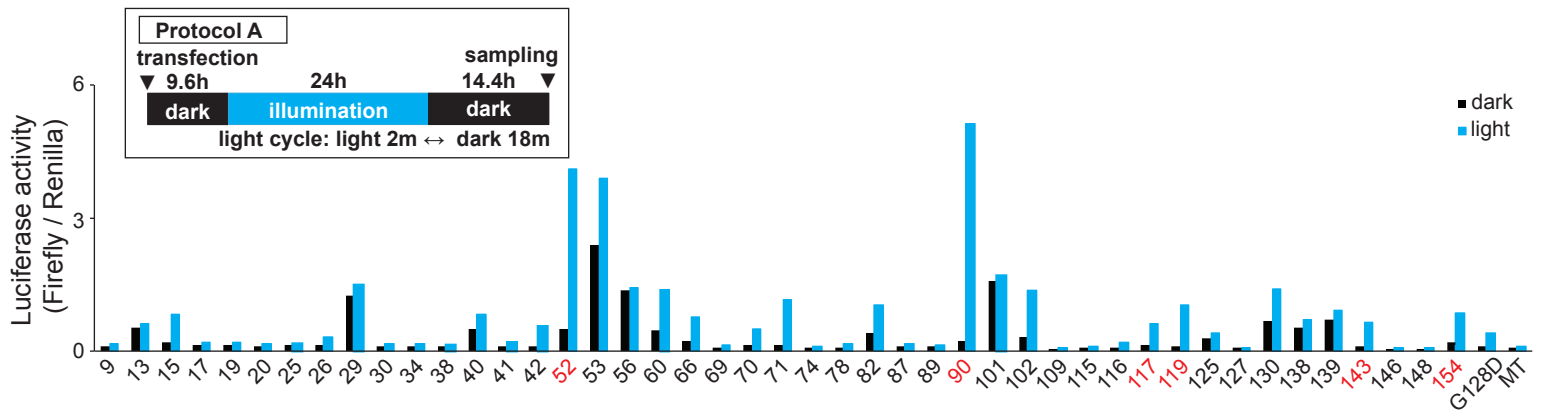

**Supplementary Figure 3 Mutant screens of FKF1 with illumination.**

A summary of the Luc assay results testing the 45 candidates that showed low background under dark conditions in Supplementary Figure 1C. Six mutants (#52, 90, 117, 119, 143 and 154) demonstrated similar or higher Luc induction with light compared to G128D ( $n=1-2$ ). MT, a light-insensitive mutant. The result of the six candidates after repeated tests was shown in Figure 1C(inset) with statistical analyses. Supplementary Figure 3 inset delineates the illumination protocol used in these experiments (blue LED, 447.5nm, 0.5 mW, 6.25  $\mu\text{W}/\text{mm}^2$ ).

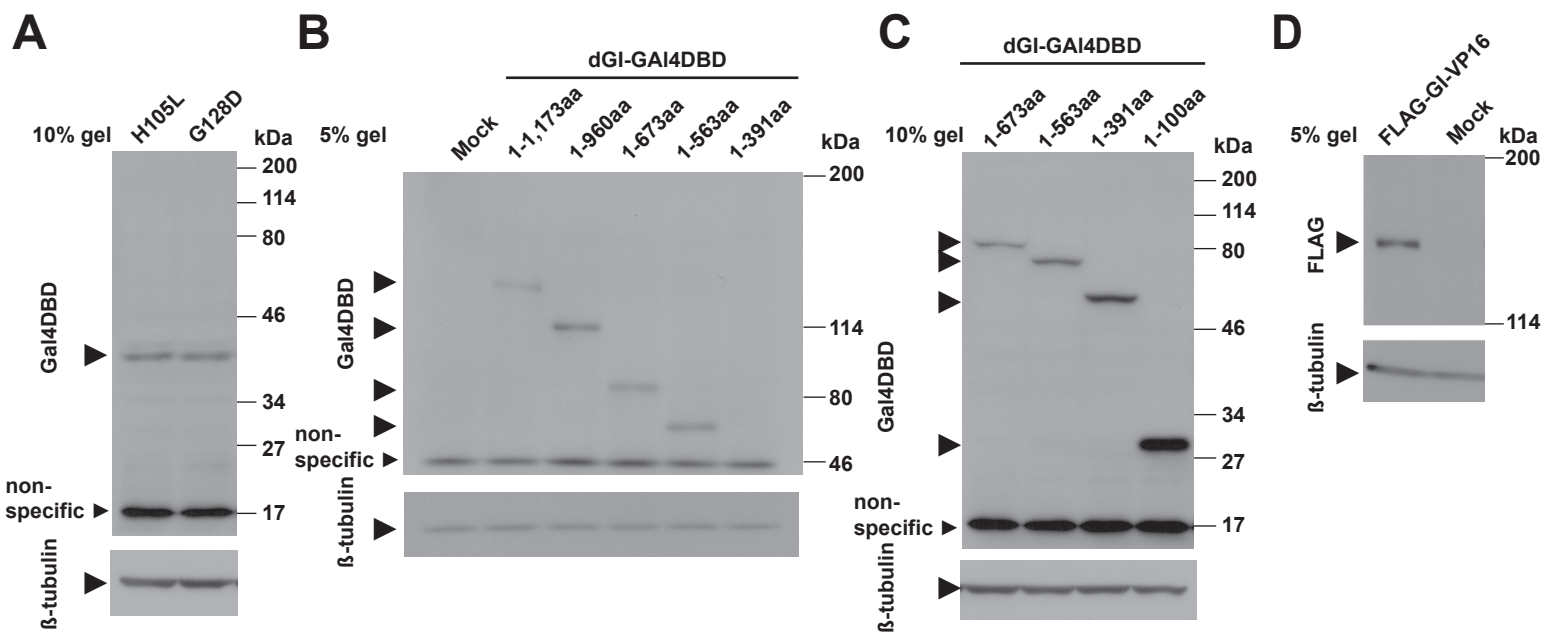

**Supplementary Figure 4 Characterization of NLOV/GI-based systems using Western blot.**

Western blotting images of Gal4DBD-NLOV (G128D or H105L) (**A**) and the full-length and deleted GI fragments (1-1,173, 960, 673, 563 and 391aa) fused with Gal4DBD at the C-terminus (**B**) and the shorter fragments of GI (1-100, 391, 563 and 673aa) fused with Gal4DBD (**C**). For Supplementary Figure 4 A-C, the arrowheads indicate the western blot bands for the various forms of Gal4DBD. (**D**) Western blotting images of FLAG-tagged GI-VP16.



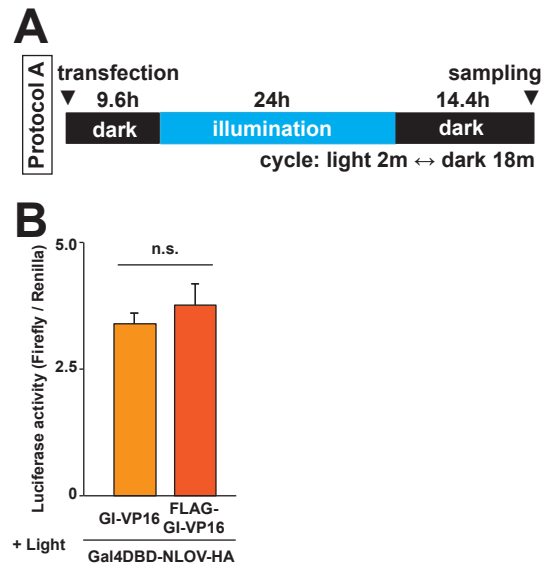

**Supplementary Figure 5 Examining the effects of FLAG-tag on the FKF1/GI-based system.**

(A) The illumination protocol used is shown (blue LED, 447.5nm, 0.5 mW, 6.25  $\mu$ W/mm<sup>2</sup>). (B) Luciferase assay to examine the effect of a FLAG-tag addition on GI-VP16 with Gal4DBD-NLOV (G128D)-HA-tag response to illumination (n.s., not significant  $n=6-9$  in 2 independent experiments, mean  $\pm$  s.e.m.).

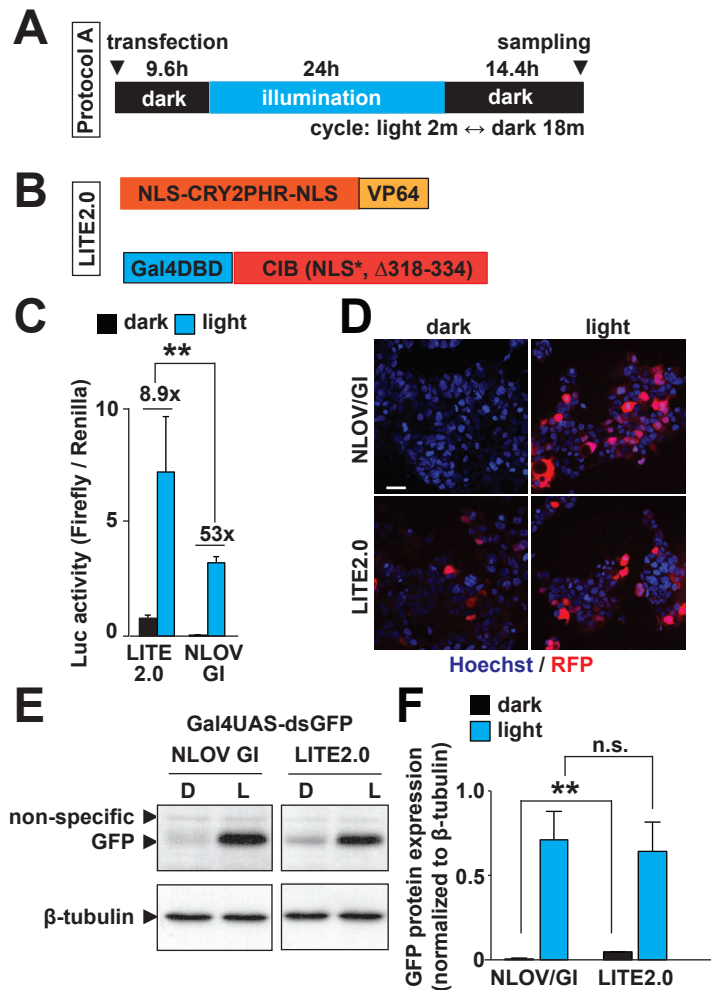

**Supplementary Figure 6 Comparison of the FKF1/GI-based system to the CRY2/CIB1-based LITE2.0 system to control transcription with light.**

(A) The illumination protocol that was used (blue LED, 447.5nm, 0.5 mW, 6.25  $\mu\text{W}/\text{mm}^2$ ). (B) The short fragments of CRY2 (CRY2PHR) and modified CIB1 were used in the LITE2.0 system (ref. 4). (C) Luc assay to test the FKF1 (NLOV, H105L)/GI-based system and LITE2.0. The LITE2.0 system demonstrated significantly increased dark signal compared to the NLOV/GI-based system (\*\*  $P < 0.01$ ,  $n = 8-10$  in 4 independent experiments, mean  $\pm$  s.d.). (D) Fluorescent images using the NLOV/GI-based and LITE2.0 systems in HEK 293T cells to express red fluorescent proteins (RFP) in live cells. Hoechst 33285 was used for nuclear staining. Scale bar, 20  $\mu\text{m}$ . (E) Western blotting using the NLOV/GI-based and LITE2.0 systems to express destabilized green fluorescent protein (dsGFP) in HEK 293T cells. A housekeeping molecule,  $\beta$ -tubulin, was examined as an internal control in the cells. D, dark. L, light. (F) Quantification of dsGFP proteins to compare the NLOV/GI-based and LITE2.0 systems. The expression of dsGFP was normalized to  $\beta$ -tubulin expression (n.s., not significant \*\*  $P < 0.01$   $n = 4$  in two independent experiments, mean  $\pm$  s.d.). The LITE2.0 system demonstrated significantly increased dark signal when compared to the FKF1/GI-based system.

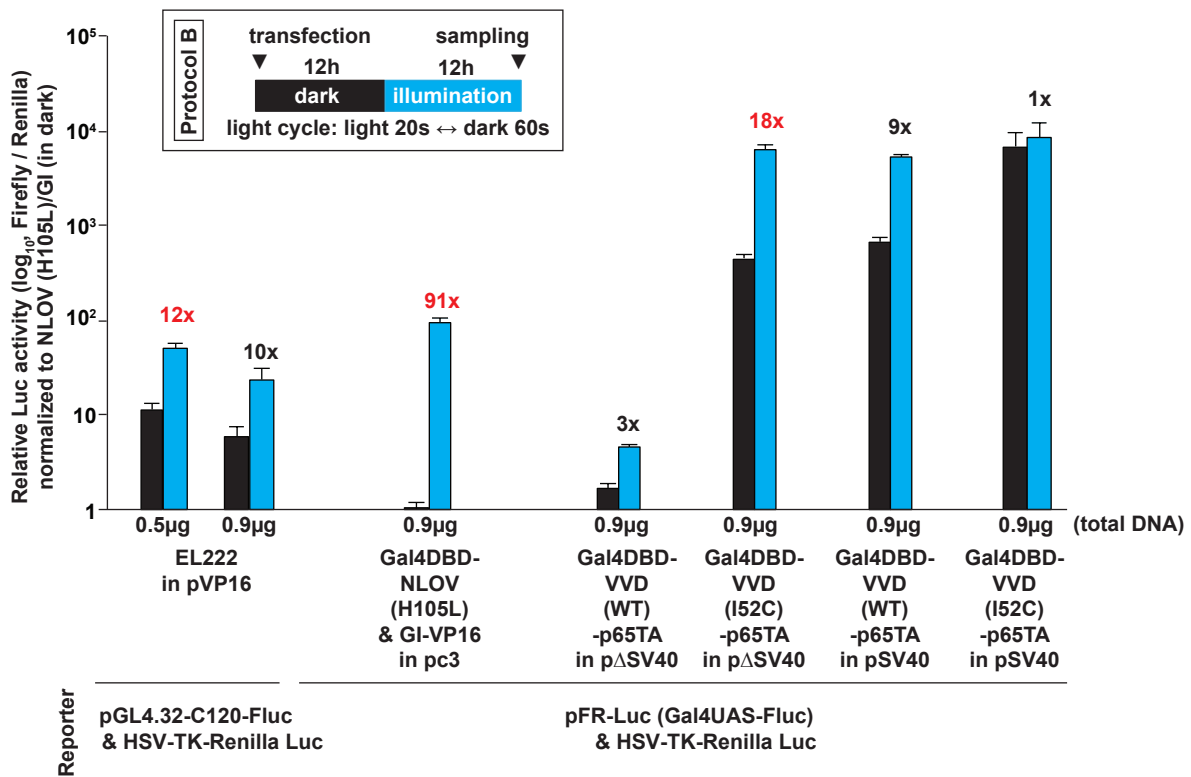

**Supplementary Figure 7 Comparisons of the FKF1/GI-based system to the other light-inducible systems.**

Comparisons of the FKF1/GI-based systems to the other light-inducible systems, the VVD/LightOn- and EL222-based systems ( $n=4-16$ , mean  $\pm$  s.d.). The DNA amounts indicated were used for transfection in a well of 24-well plates. Illumination protocol used is described in the insert (Protocol B).

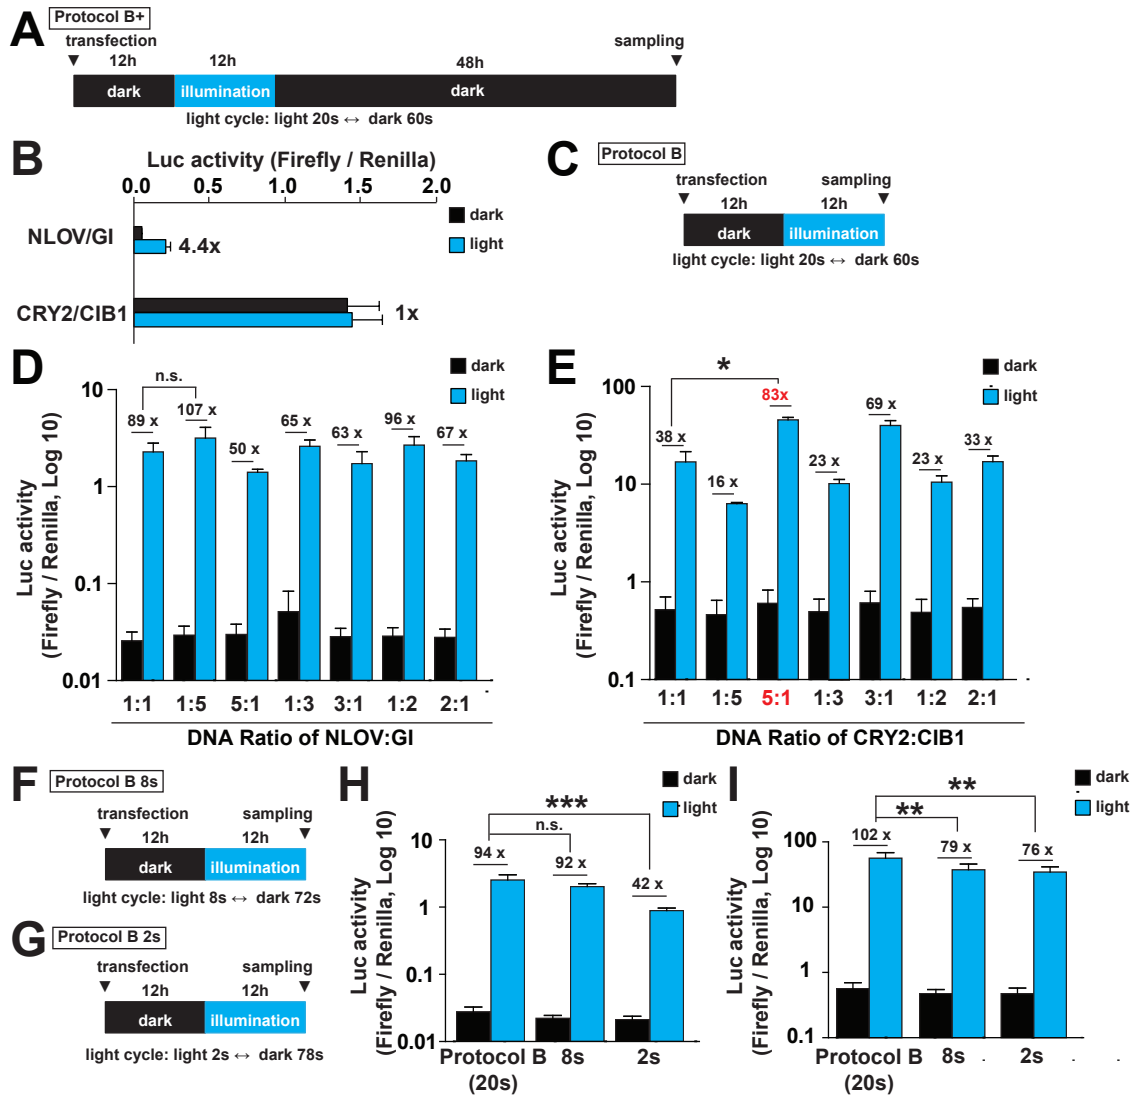

**Supplementary Figure 8 Comparison and optimization of the FKF1/GI and Cry2/CIB1 system.**

(A) Illumination protocol used in Figure S8B is indicated (blue LED, 447.5nm, 0.5 mW, 6.25  $\mu$ W/mm<sup>2</sup>). (B) Comparison of NLOV/GI and 1:1 DNA ratio CRY2/CIB1 ( $n=4$  mean  $\pm$  s.d.). (C) Illumination protocol used for in Figure S8D,E,H and I is indicated (blue LED, 447.5nm, 0.5 mW, 6.25  $\mu$ W/mm<sup>2</sup>). (D, E) DNA ratio optimization of NLOV/GI and CRY2/CIB1 respectively (\*  $P<0.05$ ,  $n=3$  in 3 independent experiments, mean  $\pm$  s.d.). CRY2/CIB1 benefits from a ratio of 5:1 CRY2:CIB1. (F, G) Illumination protocols used for in Figure S8H and I are indicated (blue LED, 447.5nm, 0.5 mW, 6.25  $\mu$ W/mm<sup>2</sup>). (H, I) Luciferase assay results of NLOV/GI and CRY2/CIB1 respectively with variable illumination cycles. (n.s., not significant, \*\*  $P<0.01$ , \*\*\*  $P<0.001$ ,  $n=12$  in 2 independent experiments for Protocol B 8s and Protocol B 2s,  $n=27$  and  $n=58$  for CRY2 and FKF1 Protocol B respectively as compiled Legacy data was used, mean  $\pm$  s.d.). NLOV/GI has a significantly decreased induction when exposed to the 2s protocol. CRY2/CIB1 has a significantly decreased induction when exposed to shorter light and longer dark cycles as compared to Protocol B.

**A** FACS HEK 293T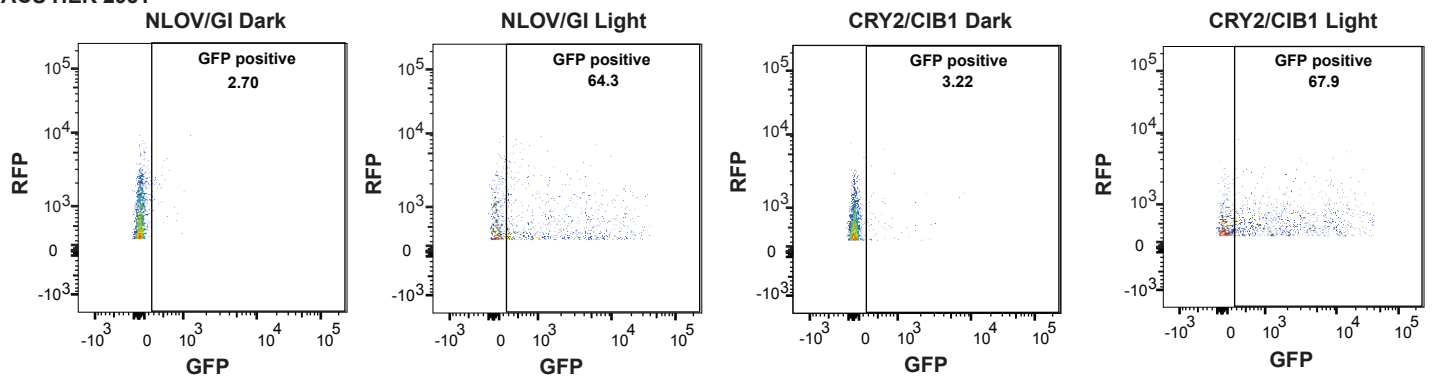**B** FACS Human Fibroblasts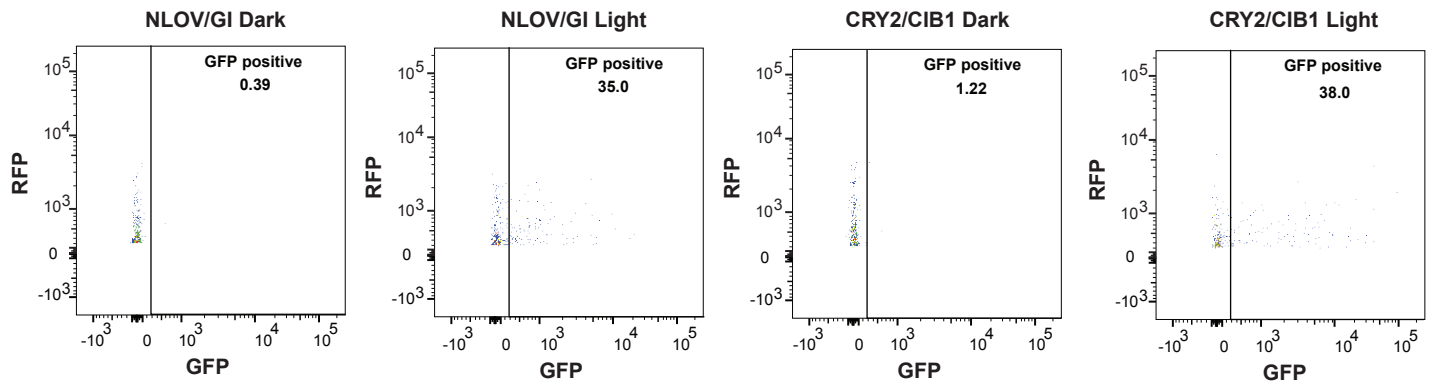**C** FACS NIH 3T3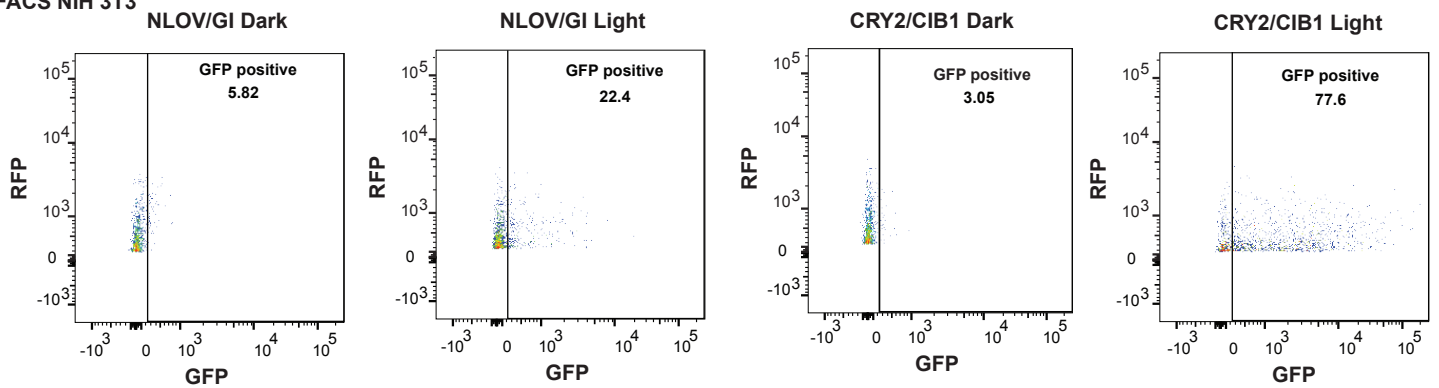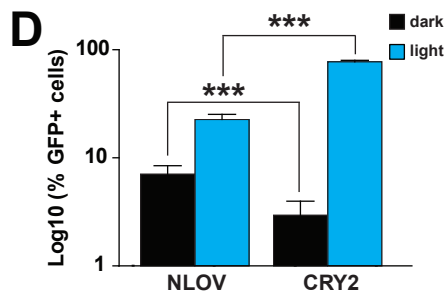

Supplementary Figure 9 Representative FACS images and NIH3T3 FACS results

(A-C) Representative FACS images for HEK 293T, Human Fibroblasts and NIH 3T3 cells respectively. The raw FACS data was sorted for live cells, then the mCherry<sup>+</sup> (transfected cells) were selected. Finally, the GFP<sup>+</sup> cells were selected in order to yield the GFP positive population of transfected cells. (D) A comparison of NLOV/GI and CRY2/CIB1 systems transfected into NIH3T3 cells illuminated following protocol B with Gal4-UAS-dsGFP (\*\*\*)  $P < 0.001$ ,  $n = 8-12$  in 2 independent experiments, mean  $\pm$  s.d.). mCherry (red fluorescent protein, RFP) plasmid was used as transfection control.

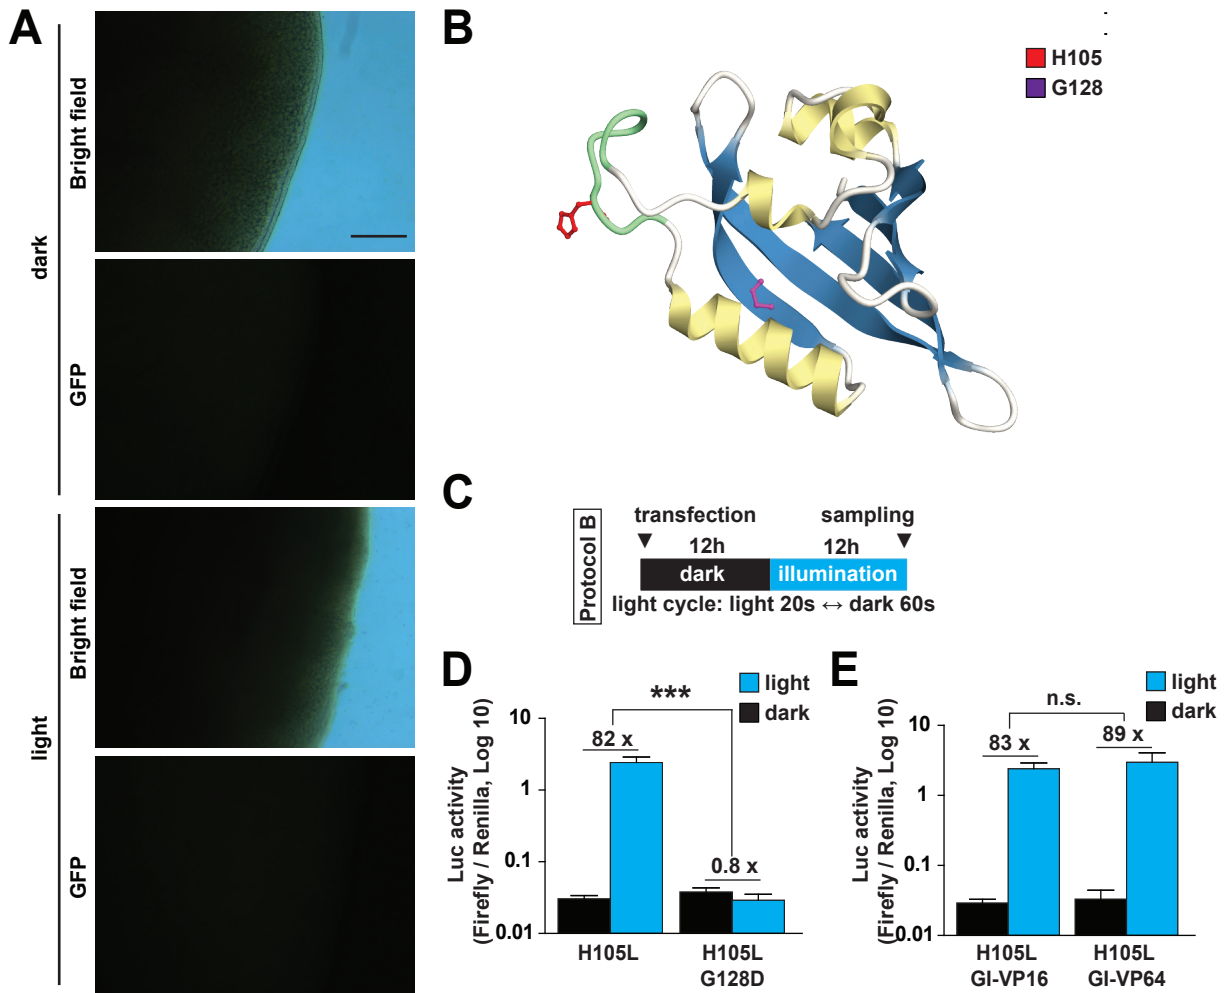

**Supplementary Figure 10 Cry2-VP16 and CIB1 NLOV/GI *in vivo* application, H105L with VP16, VP64 and NLOV/GI H105L G128D and NLOV homology model**

(A) Representative images of mouse livers from mice after illumination (dark (top), light (bottom)) using Gal4-UAS-GFP with CRY2-VP16 and CIB1-Gal4DBD with hydrodynamic tail vein plasmid injection method ( $n=4$ ). Scale bar, 2mm. (B) Homology model of FKF1 NLOV domain highlighting the H105 (red), G128 (purple) amino acids and the FKF1 family conserved loop (green). (C) Illumination protocol used in Supplementary Figure 10D and E is indicated (blue LED, 447.5nm, 0.5 mW, 6.25  $\mu\text{W}/\text{mm}^2$ ). (D) Luciferase assay results of NLOV/GI H105L and the NLOV/GI H105L G128D double mutant. (\*\*\*)  $P < 0.001$ ,  $n=8$  in 2 independent experiments, mean  $\pm$  s.d.). The double mutant has a significantly reduced induction amount compared with the NLOV/GI H105L. (E) Luciferase assay results of NLOV with GI-VP16 and GI-VP64. (n.s., not significant,  $n=12$  in 2 independent experiments, mean  $\pm$  s.d.). Using protocol B, there is no difference between the use of VP16 or VP64.

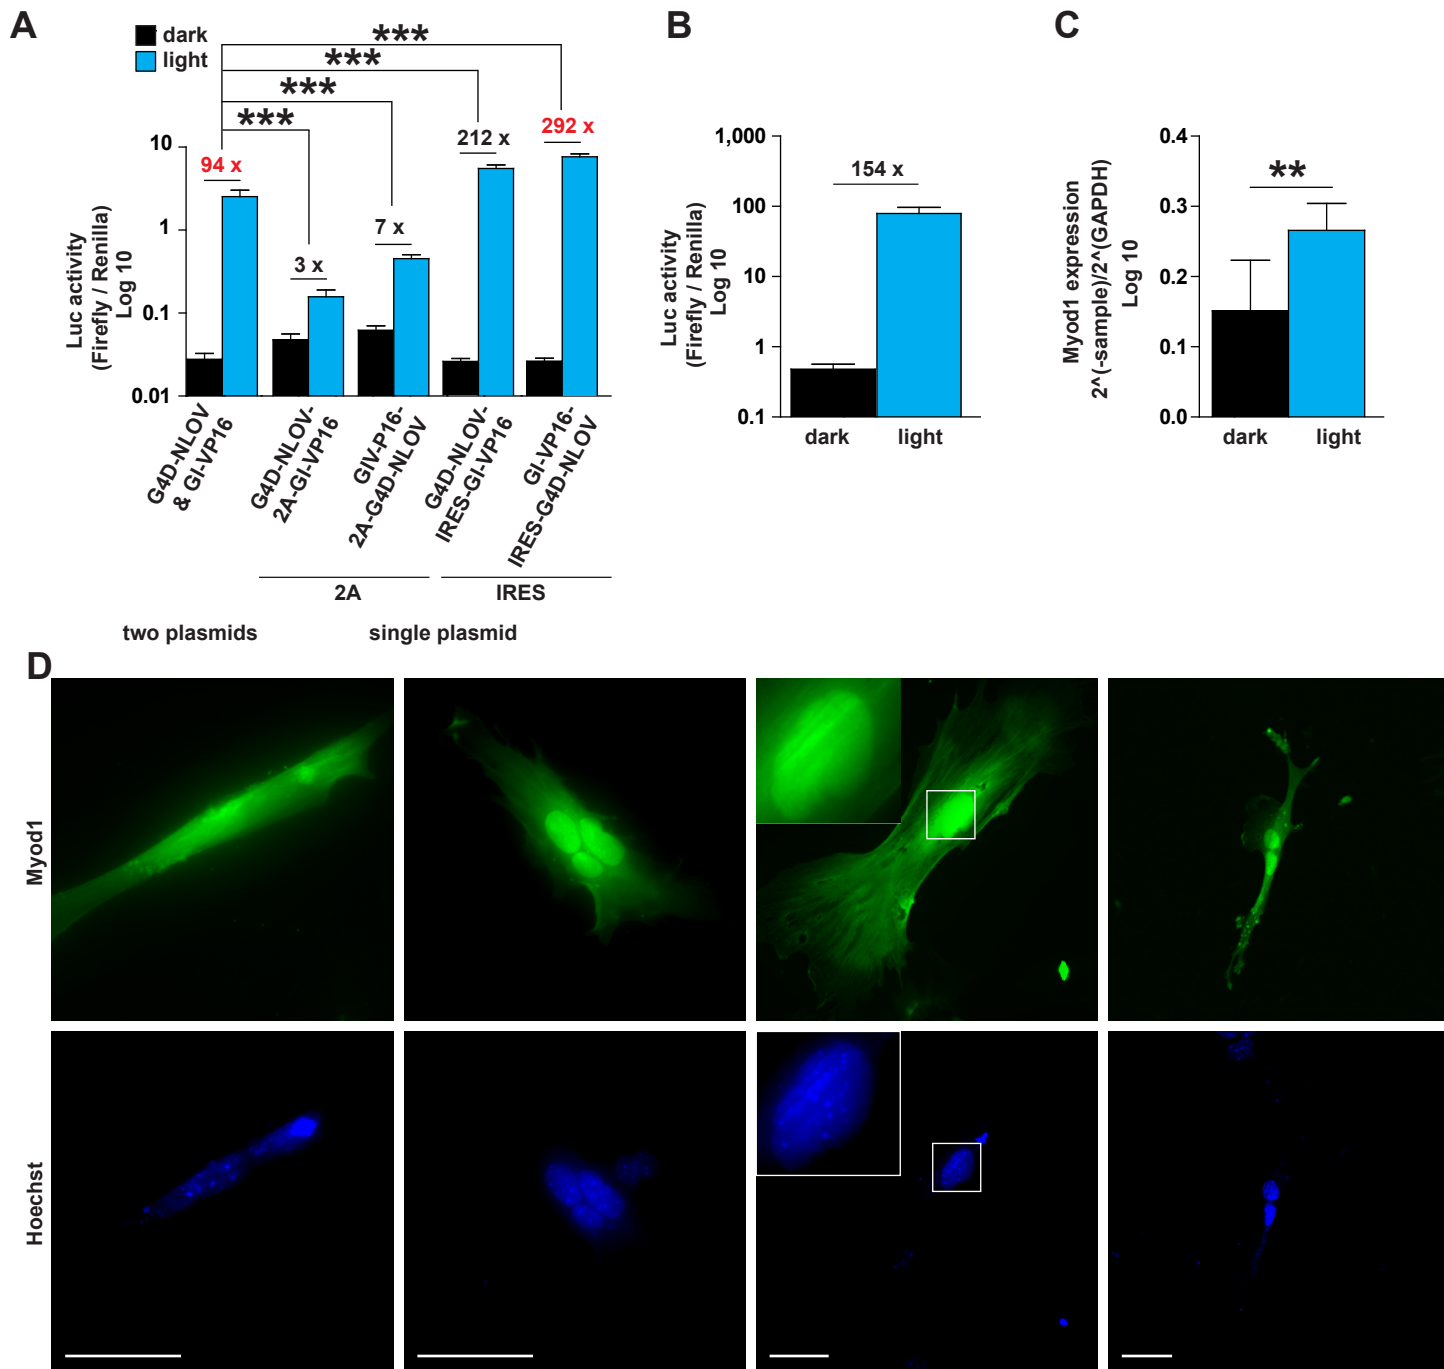

**Supplementary Figure 11 The application of the IRES version of FKF1/GI-based light-induced transcription system for Myod1 expression**

(A) Luciferase assay results of HEK 293T cells with co-transfection of two plasmids: Gal4DBD-NLOV (H105L)-HA (G4D-NLOV) and FLAG-GI-VP16 (GI-VP16) and single transfection using the 2A self-cleavage and internal ribosome entry site (IRES) systems (\*\*\*  $P < 0.001$ ,  $n = 8$  in 2 independent experiments, mean  $\pm$  s.d.). (B) Luciferase assay results of mouse embryonic fibroblasts (MEF) with the new IRES construct: FLAG-GI-VP16-IRES-Gal4DBD-NLOV (H105L)-HA and Gal4 UAS firefly luciferase ( $n = 9$  in 2 independent experiments, mean  $\pm$  s.d.). (C) Quantification of Myod1 transcript expression in MEF with the new IRES construct: FLAG-GI-VP16-IRES-Gal4DBD-NLOV (H105L)-HA and Gal4 UAS-Myod1 (\*\* $P < 0.01$ ,  $n = 7$  in 2 independent experiments, mean  $\pm$  s.d.). (D) Representative fluorescent images of immunocytochemistry for Myod1 protein expression in illuminated MEF with FLAG-GI-VP16-IRES-Gal4DBD-NLOV (H105L)-HA and Gal4 UAS-Myod1. Hoechst 33285 (blue) was used for nuclear staining. Anti mouse Myod1 antibody was used for Myod1 staining with Alexa 488 (green) secondary antibody. Scale bar, 50  $\mu$ m. Protocol B was used in these experiments.
